# Supplementary material for: Defiant: (DMRs: easy, fast, identification and ANnoTation) identifies differentially Methylated regions from iron-deficient rat hippocampus
Source: PubMed Central journal article supplement (PMC5800085; doi:10.1186/s12859-018-2037-1), 2018-02-05
Supplement: 12859_2018_2037_MOESM1_ESM.pdf [file 12859_2018_2037_MOESM1_ESM.pdf]

# Supporting Information

David E. Condon, Phu V. Tran, Yu-Chin Lien, Jonathan Schug,  
Michael K. Georgieff, Rebecca A. Simmons and Kyoung-Jae Won

## Contents

|                                                                                 |          |
|---------------------------------------------------------------------------------|----------|
| <b>S1 Artificial Data</b>                                                       | <b>2</b> |
| <b>S2 DMR-Calling on Artificial Data Set</b>                                    | <b>2</b> |
| <b>S3 Rat Data</b>                                                              | <b>4</b> |
| <b>S4 Effects of Parameters on Number of DMRs Identified in Rat Hippocampus</b> | <b>9</b> |

## S1 Artificial Data

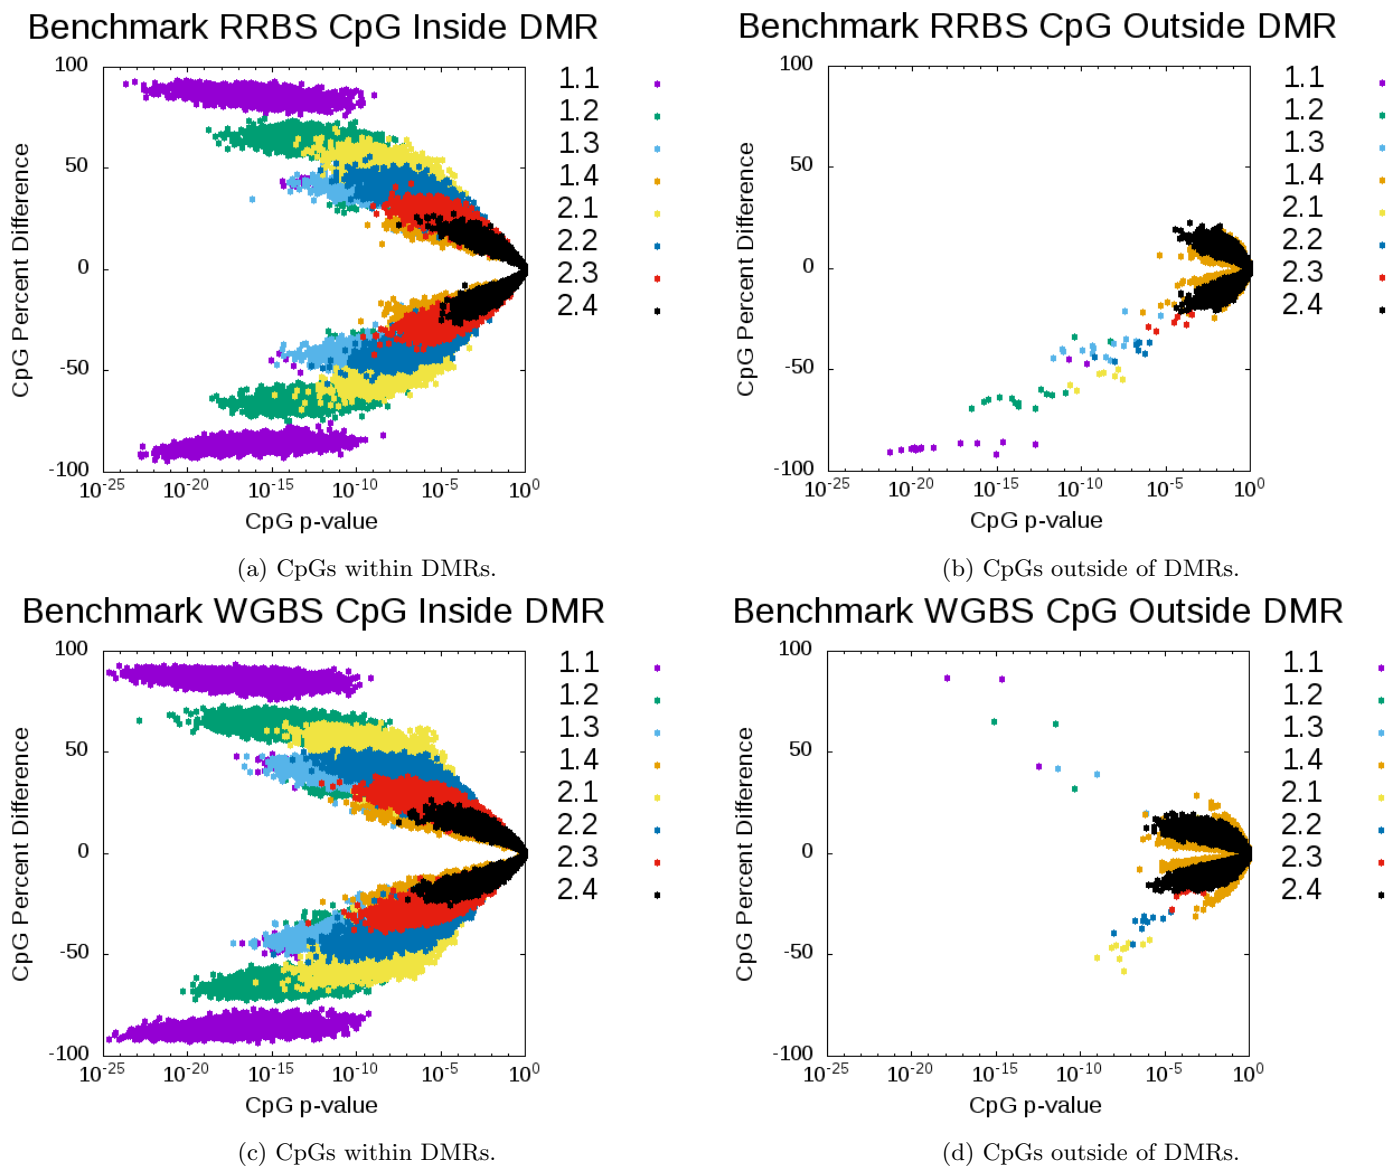

Figure S1: p-values and percent differences in the artificial data sets. Each point in each graph represents a single CpG. Background 1 DMRs show greater differences between group 1 than between group 2 sets. DMRs become increasingly similar to one another when progressing from sets 1-4 in both backgrounds, i.e. set 1.1 shows greater differences in methylation than set 1.2, etc.

## S2 DMR-Calling on Artificial Data Set

|          | DMRs | Program    | False Negative | False Positive | True Positive | Overlay | Reverse Overlay | Jaccard |
|----------|------|------------|----------------|----------------|---------------|---------|-----------------|---------|
| RRBS 1.1 | 191  | Defiant    | 4              | 0              | 187           | 97      | 99              | 0.97    |
|          |      | BH         | 4              | 0              | 187           | 97      | 99              | 0.97    |
|          |      | BY         | 4              | 0              | 187           | 97      | 99              | 0.97    |
|          |      | Holm       | 4              | 0              | 187           | 97      | 99              | 0.97    |
|          |      | Hochberg   | 4              | 0              | 187           | 97      | 99              | 0.97    |
|          |      | Bonferroni | 4              | 0              | 187           | 97      | 99              | 0.97    |
| RRBS 1.2 | 191  | Defiant    | 12             | 0              | 179           | 93      | 99              | 0.93    |
|          |      | BH         | 10             | 0              | 181           | 94      | 99              | 0.94    |
|          |      | BY         | 10             | 0              | 181           | 94      | 99              | 0.94    |
|          |      | Holm       | 10             | 0              | 181           | 94      | 99              | 0.94    |
|          |      | Hochberg   | 10             | 0              | 181           | 94      | 99              | 0.94    |
|          |      | Bonferroni | 10             | 0              | 181           | 94      | 99              | 0.94    |
| RRBS 1.3 | 191  | Defiant    | 14             | 0              | 177           | 92      | 99              | 0.92    |
|          |      | BH         | 12             | 0              | 179           | 93      | 99              | 0.93    |
|          |      | BY         | 12             | 0              | 179           | 93      | 99              | 0.93    |
|          |      | Holm       | 12             | 0              | 179           | 92      | 99              | 0.9     |
|          |      | Hochberg   | 12             | 0              | 179           | 92      | 99              | 0.9     |
|          |      | Bonferroni | 12             | 0              | 179           | 92      | 99              | 0.9     |
| RRBS 1.4 | 191  | Defiant    | 12             | 0              | 179           | 91      | 99              | 0.91    |
|          |      | BH         | 8              | 0              | 183           | 92      | 98              | 0.79    |
|          |      | BY         | 5              | 0              | 186           | 89      | 94              | 0.51    |
|          |      | Holm       | 153            | 0              | 38            | 9       | 91              | 0.068   |
|          |      | Hochberg   | 153            | 0              | 38            | 9       | 91              | 0.068   |
|          |      | Bonferroni | 153            | 0              | 38            | 9       | 91              | 0.068   |
| RRBS 2.1 | 188  | Defiant    | 9              | 0              | 179           | 94      | 93              | 0.57    |
|          |      | BH         | 9              | 0              | 179           | 95      | 99              | 0.93    |
|          |      | BY         | 9              | 0              | 179           | 95      | 99              | 0.93    |
|          |      | Holm       | 9              | 0              | 179           | 94      | 96              | 0.49    |
|          |      | Hochberg   | 9              | 0              | 179           | 94      | 96              | 0.49    |
|          |      | Bonferroni | 9              | 0              | 179           | 94      | 96              | 0.49    |
| RRBS 2.2 | 188  | Defiant    | 14             | 0              | 174           | 92      | 93              | 0.56    |
|          |      | BH         | 11             | 0              | 177           | 94      | 99              | 0.92    |
|          |      | BY         | 10             | 0              | 178           | 95      | 98              | 0.85    |
|          |      | Holm       | 20             | 0              | 168           | 82      | 93              | 0.34    |
|          |      | Hochberg   | 20             | 0              | 168           | 82      | 93              | 0.34    |
|          |      | Bonferroni | 20             | 0              | 168           | 81      | 93              | 0.33    |
| RRBS 2.3 | 188  | Defiant    | 16             | 0              | 172           | 90      | 93              | 0.55    |
|          |      | BH         | 13             | 0              | 175           | 93      | 94              | 0.46    |
|          |      | BY         | 15             | 0              | 173           | 85      | 93              | 0.38    |
|          |      | Holm       | 141            | 0              | 47            | 14      | 94              | 0.12    |
|          |      | Hochberg   | 141            | 0              | 47            | 14      | 94              | 0.12    |
|          |      | Bonferroni | 141            | 0              | 47            | 14      | 94              | 0.12    |
| RRBS 2.4 | 188  | Defiant    | 66             | 0              | 122           | 50      | 96              | 0.39    |
|          |      | BH         | 186            | 0              | 2             | 0.24    | 95              | 0.0011  |
|          |      | BY         | 0              | 0              | 0             | 0       | 0               | 0       |
|          |      | Holm       | 0              | 0              | 0             | 0       | 0               | 0       |
|          |      | Hochberg   | 0              | 0              | 0             | 0       | 0               | 0       |
|          |      | Bonferroni | 0              | 0              | 0             | 0       | 0               | 0       |
| WGBS 1.1 | 995  | Defiant    | 11             | 0              | 984           | 98      | 99              | 0.99    |
|          |      | BH         | 11             | 0              | 984           | 98      | 99              | 0.99    |
|          |      | BY         | 11             | 0              | 984           | 98      | 99              | 0.99    |
|          |      | Holm       | 11             | 0              | 984           | 98      | 99              | 0.98    |
|          |      | Hochberg   | 11             | 0              | 984           | 98      | 99              | 0.98    |
|          |      | Bonferroni | 11             | 0              | 984           | 98      | 99              | 0.98    |
| WGBS 1.2 | 995  | Defiant    | 11             | 0              | 984           | 98      | 99              | 0.99    |
|          |      | BH         | 11             | 0              | 984           | 98      | 99              | 0.99    |
|          |      | BY         | 11             | 0              | 984           | 98      | 99              | 0.99    |
|          |      | Holm       | 11             | 0              | 984           | 1e+02   | 98              | 0.79    |
|          |      | Hochberg   | 11             | 0              | 984           | 1e+02   | 98              | 0.79    |
|          |      | Bonferroni | 11             | 0              | 984           | 1e+02   | 98              | 0.79    |
| WGBS 1.3 | 995  | Defiant    | 19             | 0              | 976           | 97      | 99              | 0.98    |
|          |      | BH         | 19             | 0              | 976           | 98      | 99              | 0.98    |
|          |      | BY         | 17             | 0              | 978           | 99      | 98              | 0.86    |
|          |      | Holm       | 8              | 0              | 987           | 1.1e+02 | 88              | 0.37    |
|          |      | Hochberg   | 8              | 0              | 987           | 1.1e+02 | 88              | 0.37    |
|          |      | Bonferroni | 8              | 0              | 987           | 1.1e+02 | 88              | 0.37    |
| WGBS 1.4 | 995  | Defiant    | 15             | 0              | 980           | 93      | 99              | 0.94    |
|          |      | BH         | 16             | 0              | 979           | 94      | 96              | 0.65    |
|          |      | BY         | 65             | 0              | 930           | 90      | 86              | 0.3     |
|          |      | Holm       | 943            | 0              | 52            | 2.8     | 78              | 0.025   |
|          |      | Hochberg   | 943            | 0              | 52            | 2.8     | 78              | 0.025   |
|          |      | Bonferroni | 943            | 0              | 52            | 2.8     | 78              | 0.025   |
| WGBS 2.1 | 988  | Defiant    | 18             | 0              | 970           | 98      | 98              | 0.96    |
|          |      | BH         | 18             | 0              | 970           | 97      | 99              | 0.96    |
|          |      | BY         | 16             | 0              | 972           | 98      | 98              | 0.84    |
|          |      | Holm       | 98             | 0              | 890           | 90      | 86              | 0.32    |
|          |      | Hochberg   | 98             | 0              | 890           | 90      | 86              | 0.32    |
|          |      | Bonferroni | 98             | 0              | 890           | 90      | 86              | 0.32    |
| WGBS 2.2 | 988  | Defiant    | 22             | 0              | 966           | 97      | 98              | 0.96    |
|          |      | BH         | 20             | 0              | 968           | 97      | 96              | 0.67    |
|          |      | BY         | 18             | 0              | 970           | 99      | 93              | 0.51    |
|          |      | Holm       | 350            | 0              | 638           | 57      | 83              | 0.23    |
|          |      | Hochberg   | 350            | 0              | 638           | 57      | 83              | 0.23    |
|          |      | Bonferroni | 350            | 0              | 638           | 57      | 83              | 0.23    |
| WGBS 2.3 | 988  | Defiant    | 33             | 0              | 955           | 94      | 98              | 0.93    |
|          |      | BH         | 51             | 0              | 937           | 94      | 88              | 0.39    |
|          |      | BY         | 233            | 0              | 755           | 73      | 83              | 0.25    |
|          |      | Holm       | 920            | 0              | 68            | 4.4     | 82              | 0.039   |
|          |      | Hochberg   | 920            | 0              | 68            | 4.4     | 82              | 0.039   |
|          |      | Bonferroni | 920            | 0              | 68            | 4.4     | 82              | 0.039   |
| WGBS 2.4 | 988  | Defiant    | 392            | 0              | 596           | 47      | 99              | 0.49    |
|          |      | BH         | 0              | 0              | 0             | 0       | 0               | 0       |
|          |      | BY         | 0              | 0              | 0             | 0       | 0               | 0       |
|          |      | Holm       | 0              | 0              | 0             | 0       | 0               | 0       |
|          |      | Hochberg   | 0              | 0              | 0             | 0       | 0               | 0       |
|          |      | Bonferroni | 0              | 0              | 0             | 0       | 0               | 0       |

Table S1: Complete summary of data set performance. Each program is run on the artificial data set by Jühling, et al., and the performance is quantified according to column headings here. True negatives do not exist in this regime. Jühling, et al. made 200 DMRs in each RRBS data set, and 1000 DMRs in each WGBS data set. However, some of these DMRs overlap, which are combined to give the totals in the second column. This data is plotted in Figure 4.

|           | Defiant               | MethylKit             | MethylSig            | Metilene              | RADMeth | RnBeads            |
|-----------|-----------------------|-----------------------|----------------------|-----------------------|---------|--------------------|
| Defiant   | 1                     | $6.8 \times 10^{-12}$ | $6.1 \times 10^{-7}$ | 0.81                  | 0.02    | $1 \times 10^{-5}$ |
| MethylKit | $6.8 \times 10^{-12}$ | 1                     | 0.3                  | $1.1 \times 10^{-12}$ | 0.00024 | 0.22               |
| MethylSig | $6.1 \times 10^{-7}$  | 0.3                   | 1                    | $4 \times 10^{-7}$    | 0.0055  | 0.78               |
| Metilene  | 0.81                  | $1.1 \times 10^{-12}$ | $4 \times 10^{-7}$   | 1                     | 0.018   | $8 \times 10^{-6}$ |
| RADMeth   | 0.02                  | 0.00024               | 0.0055               | 0.018                 | 1       | 0.017              |
| RnBeads   | $1 \times 10^{-5}$    | 0.22                  | 0.78                 | $8 \times 10^{-6}$    | 0.017   | 1                  |

Table S2: Similarity of the results. A p-value is computed based on Welch's t-test to test if the F1 values are significantly different from each other. Each data set contains 16 F1 values, which are visualized in the main manuscripts Figure 3. Smaller p-values indicate two sets have similar prediction quality, and larger p-values indicate dissimilar prediction quality. Defiant and Metilene are very similar to each other, while MethylKit, MethylSig, and RnBeads are all similar.

### S3 Rat Data

Table S3: Differentially Methylated Regions in rat hippocampus from iron-deficient diet. Percentage differences are weighted.

| Chr | Start-End           | CpN | $\Delta$ CpN | Mean.Diff. | Control         | FeDef            | p(DMR)      | q(DMR, BH)  | Gene     |
|-----|---------------------|-----|--------------|------------|-----------------|------------------|-------------|-------------|----------|
| 1   | 2984116-2984175     | 5   | 3            | -54.1      | 68.2,87.8,94.1  | 35.5,3.5,66.7    | 0.030273    | 0.0370722   | Ust      |
| 1   | 3283278-3283785     | 8   | 2            | 26.3       | 85.1,70.7,62.0  | 98.1,98.7,95.2   | 0.026841    | 0.0349238   | n/a      |
| 1   | 3332817-3332836     | 5   | 4            | 49.0       | 47.1,30.0,32.4  | 99.2,79.0,41.3   | 0.0217799   | 0.0321781   | n/a      |
| 1   | 14745012-14745130   | 5   | 2            | -42.4      | 57.2,78.3,52.5  | 30.9,16.9,31.1   | 0.0112178   | 0.0254067   | n/a      |
| 1   | 24003758-24003842   | 5   | 4            | -52.9      | 63.5,97.3,85.9  | 18.9,25.4,62.7   | 0.0113219   | 0.0254067   | n/a      |
| 1   | 41054728-41054799   | 5   | 4            | -47.1      | 54.5,67.1,52.9  | 2.2,23.7,13.7    | 0.00374428  | 0.0176779   | Tmem181  |
| 1   | 41178581-41178648   | 5   | 4            | 51.9       | 32.6,27.0,30.8  | 82.5,89.7,69.7   | 0.00405702  | 0.0178665   | Ezr      |
| 1   | 53742719-53742971   | 5   | 2            | 50.5       | 68.4,31.1,43.8  | 98.7,97.2,82.0   | 0.0145519   | 0.0282406   | n/a      |
| 1   | 54900073-54900645   | 5   | 2            | 11.8       | 73.5,61.0,58.8  | 73.1,74.5,86.3   | 0.0727801   | 0.074074    | n/a      |
| 1   | 55893444-55893557   | 5   | 3            | 48.0       | 34.9,9.8,2.4    | 74.5,34.7,70.9   | 0.0181842   | 0.0307102   | Riok2    |
| 1   | 77135644-77135647   | 10  | 10           | -77.7      | 76.6,89.9,88.6  | 33.7,1.0,28.0    | 0.00378043  | 0.0176779   | Fkrp     |
| 1   | 83975016-83975169   | 7   | 3            | 21.5       | 65.3,66.6,77.8  | 88.1,92.7,98.1   | 0.00861934  | 0.0241306   | n/a      |
| 1   | 84451057-84451286   | 10  | 4            | -20.6      | 35.2,43.6,23.4  | 5.2,19.9,10.0    | 0.0333063   | 0.0387164   | Dpfl     |
| 1   | 85982567-85982780   | 10  | 4            | -18.3      | 48.6,47.5,41.3  | 24.5,29.5,27.2   | 0.00256801  | 0.0162422   | Ufb2     |
| 1   | 87122965-87123053   | 6   | 3            | 55.1       | 47.7,1.4,4.6    | 53.4,89.9,74.6   | 0.0212011   | 0.0321527   | Kctd15   |
| 1   | 111592052-111592130 | 5   | 5            | 34.7       | 29.1,32.2,30.8  | 66.5,66.4,64.3   | 2.32361e-06 | 0.000532106 | Snurf    |
| 1   | 121044743-121044809 | 6   | 6            | 63.2       | 0.0,0.0,38.2    | 76.9,92.9,73.7   | 0.0155784   | 0.0291518   | n/a      |
| 1   | 128654487-128654533 | 7   | 6            | 59.7       | 20.8,44.2,4.9   | 82.0,89.1,74.8   | 0.0178515   | 0.0307102   | Chd2     |
| 1   | 158953236-158953343 | 5   | 3            | 28.6       | 46.6,35.1,42.3  | 62.1,80.0,64.6   | 0.0108184   | 0.0252358   | Pde2a    |
| 1   | 171993800-171993818 | 8   | 6            | 73.6       | 1.0,1.0,100.0   | 100.0,55.0,100.0 | 0.0179782   | 0.0307102   | Spon1    |
| 1   | 172182951-172183695 | 5   | 3            | 25.1       | 38.5,55.6,50.5  | 74.4,81.2,61.6   | 0.00926084  | 0.0241306   | n/a      |
| 1   | 185363658-185363687 | 6   | 4            | 39.5       | 19.1,42.2,39.4  | 61.0,81.6,57.4   | 0.0116517   | 0.0255446   | Sbk1     |
| 1   | 202868640-202869000 | 7   | 2            | 15.9       | 47.9,53.6,57.2  | 68.3,68.7,73.4   | 0.00932277  | 0.0241306   | n/a      |
| 1   | 206461401-206461447 | 5   | 2            | 54.8       | 29.5,0.0,19.6   | 64.0,86.3,56.5   | 0.00531099  | 0.019938    | Unc93b1  |
| 1   | 208319368-208319451 | 10  | 7            | 12.9       | 4.4,2.5,0.4     | 16.2,14.8,14.0   | 0.00144341  | 0.0162422   | Map3k11  |
| 1   | 209815225-209815262 | 5   | 3            | 35.4       | 38.0,0.0,10.0   | 45.0,49.0,71.8   | 0.0236085   | 0.0329655   | Macrodl1 |
| 1   | 220326761-220326791 | 5   | 3            | 32.6       | 0.8,0.0,0.0     | 27.6,39.1,0.0    | 0.0327091   | 0.0385946   | Foxb2    |
| 1   | 242506849-242506883 | 6   | 6            | 46.1       | 48.7,36.0,34.9  | 100.0,91.8,68.2  | 0.00979567  | 0.0242713   | Pdec6    |
| 1   | 252626662-252626754 | 5   | 3            | -39.4      | 38.3,56.3,48.6  | 11.0,4.7,16.9    | 0.00302388  | 0.0162422   | Sh3pxd2a |
| 1   | 267364979-267365031 | 7   | 5            | 12.2       | 0.0,0.0,0.0     | 13.6,5.2,11.8    | 0.0170925   | 0.0305796   | n/a      |
| 10  | 4888901-4889304     | 9   | 6            | -33.6      | 86.2,83.2,94.6  | 67.2,48.2,53.6   | 0.00524075  | 0.019938    | n/a      |
| 10  | 11841326-11841423   | 5   | 2            | -19.1      | 93.8,94.4,92.4  | 75.6,72.0,83.5   | 0.00872419  | 0.0241306   | n/a      |
| 10  | 20351685-20351826   | 5   | 4            | -41.5      | 73.3,73.2,85.2  | 45.2,26.6,60.2   | 0.0157616   | 0.0291518   | Slit3    |
| 10  | 21254640-21254742   | 5   | 2            | 42.5       | 35.1,20.3,38.4  | 73.4,81.5,69.1   | 0.000983834 | 0.0162422   | Tenm2    |
| 10  | 40271922-40271951   | 8   | 7            | -25.1      | 19.2,30.4,29.0  | 0.6,0.0,2.5      | 0.0104426   | 0.0249099   | Hint1    |
| 10  | 45545289-45545547   | 6   | 2            | 17.8       | 48.3,44.4,35.0  | 54.8,61.6,62.1   | 0.0117995   | 0.0255446   | n/a      |
| 10  | 55714200-55714272   | 5   | 2            | -41.6      | 25.9,60.9,40.8  | 5.4,0.0,29.2     | 0.0156958   | 0.0291518   | Arhgef15 |
| 10  | 57112714-57112782   | 5   | 3            | -40.9      | 40.0,57.7,53.7  | 23.5,7.6,11.0    | 0.00132764  | 0.0162422   | n/a      |
| 10  | 67191436-67191780   | 9   | 3            | 25.2       | 76.8,51.7,59.7  | 84.8,95.6,73.5   | 0.0301709   | 0.0370722   | n/a      |
| 10  | 77093819-77093868   | 5   | 5            | 71.5       | 10.8,16.7,10.3  | 93.9,78.0,75.9   | 0.00184672  | 0.0162422   | n/a      |
| 10  | 105396059-105396099 | 9   | 6            | -17.2      | 20.3,23.8,11.2  | 0.8,0.7,1.8      | 0.0282488   | 0.0365478   | Ush1g    |
| 10  | 10829686-108296764  | 21  | 15           | 28.8       | 22.0,19.5,16.4  | 45.0,56.0,22.0   | 0.0391476   | 0.0431      | Usp36    |
| 11  | 17146066-17146106   | 9   | 8            | -30.2      | 42.6,53.0,59.0  | 35.0,7.4,24.7    | 0.0245269   | 0.0336327   | n/a      |
| 11  | 31743497-31743549   | 5   | 4            | 29.8       | 47.7,46.7,27.5  | 68.7,71.7,61.4   | 0.0204757   | 0.0316667   | Its1n    |
| 11  | 63855759-63855814   | 5   | 3            | 36.8       | 5.7,0.0,6.9     | 58.1,38.7,21.5   | 0.0260422   | 0.0346725   | Arhgap31 |
| 11  | 69580699-69580855   | 9   | 9            | 52.6       | 0.3,0.0,0.2     | 49.0,47.6,62.3   | 0.00525952  | 0.019938    | Iqcg     |
| 12  | 10060115-10060156   | 5   | 3            | -28.2      | 85.4,100.0,98.8 | 75.8,62.5,75.0   | 0.00706165  | 0.0231017   | Ttrap    |
| 12  | 16089265-16089348   | 8   | 4            | 40.2       | 0.0,18.6,8.5    | 58.6,49.8,27.5   | 0.00868512  | 0.0241306   | Prkar1b  |
| 12  | 22788417-22788467   | 5   | 4            | -36.6      | 69.9,82.4,88.6  | 23.2,53.3,49.0   | 0.0213802   | 0.0321556   | Abhd11   |
| 12  | 23585373-23585418   | 9   | 7            | -38.4      | 21.9,31.2,51.2  | 0.0,12.7,2.4     | 0.0221575   | 0.0322953   | Ncf1     |
| 12  | 23791973-23792113   | 6   | 4            | 39.2       | 34.8,33.1,22.7  | 72.8,64.4,55.7   | 0.00124335  | 0.0162422   | n/a      |
| 12  | 33719678-33719732   | 5   | 3            | 56.4       | 25.8,0.0,2.2    | 56.0,81.4,15.4   | 0.0254836   | 0.0343085   | Hiplr    |
| 12  | 34621065-34621083   | 5   | 4            | -37.7      | 39.4,55.7,65.6  | 12.8,3.7,28.8    | 0.00759221  | 0.0238167   | Tmem120b |
| 12  | 39062421-39062490   | 5   | 5            | 72.5       | 18.7,0.0,16.7   | 88.3,92.6,69.1   | 0.000822336 | 0.0162422   | n/a      |
| 12  | 43111111-43111179   | 5   | 4            | 26.8       | 20.4,0.0,14.7   | 36.2,47.3,24.7   | 0.00996287  | 0.0242713   | Ankrd13a |
| 13  | 40660450-40660482   | 5   | 4            | 37.9       | 2.8,0.0,25.8    | 59.9,40.8,47.8   | 0.0139099   | 0.0276989   | n/a      |
| 13  | 44269540-44269643   | 5   | 2            | 28.6       | 35.2,51.5,39.0  | 61.8,68.5,90.7   | 0.0128098   | 0.0259597   | Srgap2   |
| 13  | 48819200-48819299   | 31  | 22           | 29.8       | 47.6,31.8,37.7  | 66.8,66.6,74.6   | 0.00247569  | 0.0162422   | n/a      |
| 13  | 51913209-51913262   | 5   | 3            | 42.7       | 36.7,41.6,45.9  | 81.8,93.5,66.4   | 0.0186019   | 0.0307102   | n/a      |
| 13  | 69053464-69053587   | 6   | 3            | -34.2      | 53.3,79.4,55.3  | 18.2,39.0,43.0   | 0.0230969   | 0.0327881   | n/a      |
| 13  | 94586882-94586912   | 6   | 6            | -44.2      | 43.8,66.5,57.3  | 0.8,0.0,31.1     | 0.0184648   | 0.0307102   | Kif26b   |
| 13  | 95168374-95168497   | 6   | 3            | -28.2      | 69.9,87.0,88.6  | 38.0,69.3,90.2   | 0.110058    | 0.11519     | Smyd3    |
| 13  | 106031408-106031457 | 3   | 3            | 30.1       | 62.6,54.4,56.6  | 86.0,90.1,79.5   | 0.00071932  | 0.0162422   | Ptpn14   |
| 14  | 2958537-2958713     | 5   | 2            | 11.8       | 65.0,71.0,79.5  | 76.4,82.7,88.2   | 0.0288184   | 0.0368358   | n/a      |
| 14  | 4804119-4804353     | 6   | 3            | -38.3      | 66.5,65.2,100.0 | 45.7,36.6,66.0   | 0.03895     | 0.0431      | n/a      |
| 14  | 9078808-9078864     | 6   | 2            | -27.8      | 85.5,84.0,82.3  | 73.8,48.3,62.3   | 0.0437367   | 0.0472439   | Cds1     |
| 14  | 11126297-11126452   | 8   | 6            | 42.1       | 4.9,1.0,0.0     | 40.8,52.8,34.3   | 0.00739733  | 0.0235276   | n/a      |
| 14  | 49295945-49296146   | 5   | 3            | 10.6       | 58.6,65.0,64.4  | 72.2,78.5,67.0   | 0.0298388   | 0.0369357   | n/a      |
| 14  | 78263930-78263981   | 5   | 4            | 30.9       | 19.5,0.4,5.2    | 34.2,42.8,36.2   | 0.0099039   | 0.0242713   | n/a      |
| 14  | 83328062-83328105   | 7   | 4            | 37.4       | 20.5,0.0,0.5    | 53.0,15.8,43.5   | 0.0119357   | 0.0255446   | Slc5a1   |
| 14  | 86532721-86532789   | 5   | 2            | 10.5       | 68.3,82.9,61.1  | 77.4,73.9,86.8   | 0.116593    | 0.11762     | Aebp1    |
| 14  | 86683252-86683607   | 9   | 5            | 19.3       | 30.6,45.5,42.7  | 55.3,66.8,52.2   | 0.0216243   | 0.0321556   | Camk2b   |
| 14  | 92399606-92399670   | 6   | 3            | -35.1      | 74.2,86.6,81.8  | 50.5,40.8,61.1   | 0.00393701  | 0.0176779   | n/a      |
| 14  | 103656026-103656093 | 6   | 4            | -40.4      | 51.5,52.6,36.1  | 1.2,12.8,19.9    | 0.00284589  | 0.0162422   | Comm1d1  |
| 15  | 186859274-18685409  | 7   | 3            | 27.3       | 11.4,1.1,1.1    | 24.4,31.2,36.5   | 0.0019221   | 0.0162422   | Kctd6    |
| 15  | 4735634-47356350    | 5   | 5            | 35.4       | 2.1,0.0,9.7     | 0.4,6.2,29.1     | 0.0295973   | 0.0368358   | n/a      |
| 15  | 5662270-56622384    | 5   | 2            | 27.4       | 61.6,65.9,59.5  | 94.1,93.0,68.9   | 0.020400    | 0.0316667   | Cog3     |
| 15  | 57197525-57197705   | 5   | 3            | 46.7       | 54.2,35.4,46.4  | 88.2,99.0,84.5   | 0.00078294  | 0.0162422   | n/a      |
| 15  | 71038760-71038830   | 7   | 4            | -31.3      | 44.9,35.5,53.4  | 25.6,10.4,12.5   | 0.00478432  | 0.0192212   | n/a      |
| 15  | 89916679-89916730   | 5   | 3            | 38.2       | 37.0,41.4,24.7  | 67.2,77.0,73.0   | 0.00283125  | 0.0162422   | n/a      |
| 15  | 105901274-105901326 | 5   | 4            | 32.6       | 15.2,0.0,1.8    | 39.9,47.2,33.7   | 0.00470636  | 0.0192212   | n/a      |
| 16  | 874927-874996       | 5   | 3            | 14.8       | 9.0,10.3,12.1   | 28.8,27.4,8.8    | 0.04543     | 0.0483882   | n/a      |

Continued on next page

Table S3 – continued from previous page

| Chr | Start-End           | CpN | ΔCpN | Mean.Diff. | Control         | FeDef            | p(DMR)      | q(DMR, BH) | Gene      |
|-----|---------------------|-----|------|------------|-----------------|------------------|-------------|------------|-----------|
| 16  | 2611707-2611912     | 6   | 5    | -19.8      | 92.7,96.1,88.8  | 64.4,77.4,56.4   | 0.0453399   | 0.0483882  | Arlhgef3  |
| 16  | 9778982-9779163     | 6   | 2    | -19.5      | 83.9,100.0,87.1 | 73.8,71.4,64.3   | 0.0284361   | 0.0365835  | n/a       |
| 16  | 18886302-18886380   | 8   | 5    | -20.4      | 29.7,22.0,20.0  | 2.1,0.9,2.9      | 0.00698341  | 0.0231017  | Jak3      |
| 16  | 36318586-36318678   | 5   | 4    | -34.3      | 42.9,58.3,41.0  | 18.3,7.9,25.0    | 0.00573369  | 0.0211776  | n/a       |
| 16  | 60564878-60564937   | 7   | 4    | -19.4      | 6.2,24.1,20.4   | 0.3,0.0,3.2      | 0.0179139   | 0.0307102  | Fpp1r3b   |
| 16  | 76246820-76247048   | 6   | 3    | 33.4       | 70.2,21.7,10.3  | 44.5,51.3,31.6   | 0.0041934   | 0.0181187  | n/a       |
| 16  | 76945869-76945907   | 6   | 6    | -48.5      | 51.5,71.3,57.0  | 22.2,4.6,13.6    | 0.00201781  | 0.0162422  | n/a       |
| 16  | 78707244-78707433   | 6   | 3    | 23.1       | 53.8,46.1,50.0  | 68.0,79.0,71.3   | 0.00494369  | 0.019519   | n/a       |
| 16  | 83012122-83012301   | 7   | 2    | 17.4       | 20.7,6.1,16.6   | 30.8,33.4,33.6   | 0.0228205   | 0.0326618  | n/a       |
| 17  | 4281441-4281478     | 8   | 8    | 33.7       | 0.0,1.7,18.9    | 37.1,54.2,1.8    | 0.0325863   | 0.0385946  | n/a       |
| 17  | 8854702-8854734     | 5   | 5    | 15.9       | 0.0,0.3,0.0     | 19.0,17.2,13.2   | 0.00601435  | 0.0215201  | n/a       |
| 17  | 15935669-15935742   | 5   | 4    | 32.7       | 41.7,39.7,57.0  | 83.1,86.7,76.6   | 0.0100801   | 0.0242983  | n/a       |
| 17  | 22396243-22396561   | 7   | 2    | 19.6       | 75.1,78.7,69.8  | 95.6,92.0,88.4   | 0.00218851  | 0.0162422  | n/a       |
| 17  | 22609252-22609299   | 5   | 4    | -56.5      | 57.5,100.0,81.5 | 28.7,25.7,53.3   | 0.00784158  | 0.0241306  | n/a       |
| 17  | 26064417-26064604   | 5   | 3    | 26.5       | 15.5,41.6,35.6  | 76.1,50.1,63.8   | 0.0319702   | 0.0385325  | n/a       |
| 17  | 73067990-73068071   | 6   | 2    | -19.7      | 90.8,93.4,79.5  | 67.1,64.8,83.2   | 0.0183347   | 0.0307102  | Adarb2    |
| 17  | 81114169-81114311   | 7   | 3    | 15.2       | 74.3,81.9,73.5  | 90.6,89.5,92.3   | 0.00923972  | 0.0241306  | n/a       |
| 17  | 93284212-93284310   | 8   | 4    | 43.1       | 15.7,0.0,12.6   | 65.1,61.3,34.0   | 0.0191771   | 0.0307102  | Armc3     |
| 18  | 2156838-2156872     | 6   | 6    | 48.9       | 38.1,0.0,17.8   | 78.7,63.2,17.2   | 0.0204432   | 0.0316667  | Mib1      |
| 18  | 23768658-23768682   | 9   | 9    | 22.3       | 0.4,0.0,12.9    | 19.1,32.5,18.6   | 0.0128081   | 0.0259597  | n/a       |
| 18  | 24357111-24357179   | 10  | 8    | -11.6      | 12.2,12.5,8.2   | 1.0,0.0,0.0      | 0.000746369 | 0.0162422  | Lims2     |
| 18  | 31022806-31022976   | 5   | 2    | -29.9      | 74.1,96.6,78.3  | 48.3,59.0,53.7   | 0.0189068   | 0.0307102  | n/a       |
| 18  | 31178559-31178577   | 5   | 2    | -17.2      | 30.3,26.2,42.1  | 13.2,8.3,17.7    | 0.020214    | 0.0316667  | RGD735029 |
| 18  | 49143687-49143733   | 7   | 5    | -33.0      | 35.0,0.0,43.6   | 4.2,0.3,0.8      | 0.0475656   | 0.0504283  | n/a       |
| 18  | 54715910-54716038   | 5   | 4    | 58.5       | 24.9,38.7,15.2  | 86.9,95.8,69.3   | 0.00179423  | 0.0162422  | Adamts19  |
| 18  | 63553630-63553823   | 9   | 3    | -15.1      | 81.2,76.0,77.9  | 58.3,68.6,62.7   | 0.0132092   | 0.0265342  | n/a       |
| 19  | 14099548-14099609   | 5   | 3    | -22.4      | 90.7,100.0,96.9 | 79.2,73.1,73.2   | 0.00293713  | 0.0162422  | Rasd42    |
| 19  | 22720661-22720747   | 6   | 2    | 24.3       | 64.5,74.8,56.6  | 80.2,94.9,95.6   | 0.0175453   | 0.0307102  | n/a       |
| 19  | 22849465-22849522   | 6   | 3    | -39.0      | 96.9,100.0,87.5 | 72.4,44.5,76.0   | 0.0291378   | 0.0368358  | Dnaj2     |
| 19  | 25001054-25001122   | 6   | 5    | 37.6       | 42.5,17.8,50.4  | 94.7,69.5,69.1   | 0.0231951   | 0.0327881  | n/a       |
| 19  | 25712441-25712473   | 5   | 5    | -37.6      | 29.7,48.8,39.1  | 0.0,0.5,3.5      | 0.00923059  | 0.0241306  | n/a       |
| 19  | 38713521-38713538   | 5   | 2    | 46.9       | 33.3,10.9,38.1  | 69.2,82.5,59.3   | 0.0086472   | 0.0241306  | n/a       |
| 19  | 38980387-38980420   | 5   | 4    | -23.1      | 70.0,80.0,88.4  | 65.3,59.7,53.8   | 0.016757    | 0.0304455  | n/a       |
| 19  | 52002579-52002798   | 8   | 2    | 25.1       | 69.0,76.6,90.7  | 97.4,91.4,85.7   | 0.00908934  | 0.0241306  | Jph3      |
| 19  | 52899132-52899183   | 5   | 2    | 33.3       | 57.8,64.3,50.4  | 95.1,86.3,81.6   | 0.00130456  | 0.0162422  | Pabpn11   |
| 2   | 12283994-12284047   | 5   | 3    | 27.9       | 2.0,0.0,0.0     | 39.0,28.4,13.5   | 0.0157852   | 0.0291518  | n/a       |
| 2   | 29168336-29168379   | 9   | 4    | 21.2       | 2.1,0.0,0.3     | 0.0,28.2,17.5    | 0.0495389   | 0.0518009  | n/a       |
| 2   | 31424242-31424271   | 6   | 2    | 17.9       | 0.0,0.0,3.1     | 20.7,11.4,17.6   | 0.00430524  | 0.0182159  | Marveld2  |
| 2   | 121891228-121891476 | 6   | 3    | -40.8      | 64.5,75.1,67.4  | 25.9,37.5,22.6   | 0.000798562 | 0.0162422  | n/a       |
| 2   | 181597557-181597692 | 5   | 4    | -58.8      | 76.3,95.5,90.2  | 35.2,13.6,27.7   | 0.00124966  | 0.0162422  | n/a       |
| 2   | 221045909-221045988 | 5   | 3    | 21.1       | 73.8,73.9,78.5  | 98.5,97.0,88.4   | 0.00220147  | 0.0162422  | n/a       |
| 2   | 235588411-235588653 | 7   | 4    | -43.3      | 56.8,93.1,72.8  | 42.6,21.7,41.8   | 0.0125395   | 0.0259597  | n/a       |
| 2   | 242429702-242430218 | 5   | 2    | -23.4      | 73.1,81.0,86.4  | 54.7,52.9,68.3   | 0.00922422  | 0.0241306  | n/a       |
| 2   | 244585404-244585449 | 6   | 3    | 59.7       | 45.9,82.4,17.9  | 97.0,100.0,63.0  | 0.0328644   | 0.0385946  | n/a       |
| 20  | 8714262-8714300     | 5   | 5    | 23.6       | 0.0,0.9,1.2     | 34.1,18.6,18.2   | 0.0322619   | 0.0385946  | Btdb9     |
| 20  | 10508413-10508515   | 6   | 2    | -20.5      | 91.5,95.2,93.4  | 68.8,75.3,71.4   | 0.00238295  | 0.0162422  | n/a       |
| 20  | 12719388-12719472   | 10  | 10   | -57.3      | 63.1,11.1,17.2  | 7.9,5.0,3.4      | 0.033603    | 0.0388641  | Dip2a     |
| 20  | 14232267-14232470   | 7   | 4    | 22.5       | 31.2,20.1,50.0  | 69.0,58.6,49.6   | 0.0622895   | 0.0636799  | n/a       |
| 20  | 21840729-21840811   | 17  | 14   | 31.1       | 58.3,61.6,41.0  | 63.0,89.3,89.8   | 0.025619    | 0.0343085  | n/a       |
| 20  | 43959021-43959029   | 5   | 5    | 16.7       | 64.1,66.3,71.0  | 83.9,83.0,82.8   | 0.00664756  | 0.0227207  | Rev3l     |
| 20  | 45220690-45220716   | 5   | 5    | 47.9       | 15.3,0.0,17.7   | 52.1,69.9,61.1   | 0.00150237  | 0.0162422  | Fig4      |
| 3   | 512284-513118       | 6   | 2    | 12.5       | 69.3,62.3,72.3  | 83.5,80.7,79.5   | 0.0222823   | 0.0322953  | n/a       |
| 3   | 857533-857571       | 6   | 3    | -21.5      | 90.4,83.3,85.7  | 67.5,62.8,75.9   | 0.00391654  | 0.0176779  | n/a       |
| 3   | 6093327-6093452     | 5   | 3    | -42.9      | 45.2,72.0,62.0  | 21.7,5.1,25.6    | 0.00598267  | 0.0215201  | Sardh     |
| 3   | 8484968-8485016     | 6   | 5    | -37.6      | 34.0,60.6,48.2  | 29.1,0.0,19.2    | 0.018827    | 0.0307102  | n/a       |
| 3   | 23226986-23227030   | 11  | 9    | 37.4       | 57.1,45.9,33.6  | 77.7,87.2,56.4   | 0.0190621   | 0.0307102  | n/a       |
| 3   | 52516532-52516792   | 5   | 2    | 17.1       | 85.2,85.3,79.2  | 100.0,99.6,100.0 | 0.00956842  | 0.0242094  | Myo3b     |
| 3   | 90642611-90642715   | 5   | 2    | -45.6      | 66.2,100.0,98.9 | 47.1,12.3,76.1   | 0.0409278   | 0.0448444  | LOC691083 |
| 3   | 114681988-114682283 | 6   | 2    | -22.4      | 59.3,44.0,64.4  | 50.2,30.2,34.3   | 0.0295529   | 0.0368358  | n/a       |
| 3   | 142445820-142445854 | 6   | 4    | 36.8       | 14.8,8.2,4.1    | 38.1,61.0,32.0   | 0.0313729   | 0.0380126  | Sert2     |
| 3   | 142623641-142623664 | 6   | 6    | 13.5       | 0.0,0.0,0.0     | 16.1,14.1,0.0    | 0.0376158   | 0.0420196  | Tbc1d20   |
| 3   | 145186118-145186253 | 5   | 3    | 47.6       | 18.4,20.9,21.5  | 58.9,86.5,53.8   | 0.03125     | 0.0380126  | n/a       |
| 3   | 147228964-147229028 | 5   | 2    | 32.2       | 73.2,61.3,61.3  | 97.1,94.2,94.1   | 0.00317907  | 0.0165456  | n/a       |
| 3   | 147652273-147652381 | 5   | 4    | 55.5       | 47.7,0.0,23.6   | 72.5,86.9,84.7   | 0.0202811   | 0.0316667  | n/a       |
| 3   | 163145309-163145362 | 5   | 4    | 42.2       | 39.5,28.1,47.5  | 97.0,83.5,75.8   | 0.00219583  | 0.0162422  | n/a       |
| 3   | 163998942-163999150 | 5   | 3    | -48.2      | 81.0,89.2,65.8  | 27.5,27.0,38.9   | 0.00724292  | 0.023361   | n/a       |
| 3   | 169107440-169107470 | 6   | 5    | -18.6      | 17.7,23.2,0.0   | 0.2,0.0,0.9      | 0.0369772   | 0.0415087  | Ss1811    |
| 4   | 18887802-18887867   | 5   | 3    | -36.5      | 93.3,82.7,91.5  | 54.9,45.0,84.6   | 0.0294021   | 0.0368358  | n/a       |
| 4   | 30043178-30043287   | 6   | 3    | -10.0      | 96.0,98.4,93.1  | 85.5,86.4,86.0   | 0.0150873   | 0.0287916  | Pon2      |
| 4   | 64617299-64617342   | 5   | 3    | 51.3       | 71.6,28.5,46.7  | 90.8,100.0,80.6  | 0.0126591   | 0.0259597  | Dgki      |
| 4   | 64694008-64694079   | 5   | 3    | 35.6       | 0.6,0.0,0.0     | 34.3,42.9,19.2   | 0.0215731   | 0.0321556  | n/a       |
| 4   | 79078961-79078979   | 5   | 5    | -36.5      | 83.3,100.0,72.7 | 35.9,53.8,57.1   | 0.0161661   | 0.0296162  | n/a       |
| 4   | 83224864-83224882   | 6   | 2    | -23.3      | 16.6,45.8,35.5  | 15.4,5.1,26.5    | 0.0492341   | 0.0517184  | n/a       |
| 4   | 116220692-116221039 | 6   | 3    | 23.9       | 58.8,65.2,88.5  | 86.1,91.9,96.3   | 0.0576563   | 0.0592075  | Mrp119    |
| 4   | 117883970-117884074 | 5   | 2    | -27.7      | 79.1,83.6,91.4  | 72.4,49.5,66.1   | 0.0233906   | 0.0328616  | n/a       |
| 4   | 125493483-125493628 | 7   | 5    | 35.4       | 65.2,52.4,57.8  | 97.3,98.6,65.0   | 0.0348407   | 0.0396494  | n/a       |
| 4   | 135068059-135068209 | 6   | 3    | 25.6       | 13.8,0.6,12.2   | 44.5,34.2,23.1   | 0.0109894   | 0.0252358  | n/a       |
| 4   | 135419854-135420078 | 5   | 4    | 29.5       | 28.6,26.4,4.8   | 66.9,32.8,46.5   | 0.0501873   | 0.0522404  | n/a       |
| 4   | 152175717-152175986 | 5   | 2    | 37.3       | 49.6,53.9,38.5  | 82.0,92.9,70.9   | 0.00389964  | 0.0176779  | n/a       |
| 4   | 155004956-155005063 | 5   | 2    | 27.9       | 28.9,0.0,11.6   | 40.5,33.3,55.8   | 0.0219386   | 0.0322048  | Caenalc   |
| 4   | 156652330-156652470 | 5   | 4    | 31.8       | 70.2,40.5,50.4  | 82.7,80.8,89.0   | 0.0349401   | 0.0396494  | B4galnt3  |
| 4   | 173782222-173782340 | 9   | 9    | 86.6       | 2.2,2.9,0.0     | 93.6,88.5,80.6   | 0.00055303  | 0.0162422  | Gucy2c    |
| 4   | 180853644-180853654 | 6   | 2    | -20.1      | 23.8,21.8,22.8  | 5.2,0.0,2.6      | 0.00293218  | 0.0162422  | Stsial1   |
| 4   | 183227074-183227255 | 5   | 2    | 29.4       | 54.7,48.2,43.5  | 83.5,73.9,79.0   | 0.00134202  | 0.0162422  | n/a       |
| 5   | 23291095-23291135   | 11  | 9    | 26.5       | 77.6,68.4,57.4  | 96.4,83.8,96.2   | 0.0189427   | 0.0307102  | Clvs1     |
| 5   | 36423056-36423067   | 5   | 4    | 24.5       | 0.0,2.0,0.3     | 22.8,30.5,17.2   | 0.0183721   | 0.0307102  | n/a       |
| 5   | 47480035-47480257   | 7   | 3    | -20.7      | 21.0,25.0,25.6  | 4.4,3.2,2.4      | 0.000921858 | 0.0162422  | n/a       |
| 5   | 74610996-74611190   | 5   | 2    | -17.4      | 15.3,20.2,24.5  | 2.3,1.2,14.2     | 0.00704929  | 0.0231017  | n/a       |
| 5   | 122024952-122025056 | 6   | 2    | -35.3      | 74.2,55.1,73.9  | 20.9,18.7,40.3   | 0.0123664   | 0.0259597  | n/a       |
| 5   | 122084769-122084813 | 6   | 4    | 56.0       | 16.7,0.0,21.0   | 68.0,80.1,63.4   | 0.000769255 | 0.0162422  | Ak4       |
| 5   | 135420990-135421016 | 7   | 6    | -35.1      | 56.7,67.3,62.2  | 22.5,18.8,40.3   | 0.00915786  | 0.0241306  | n/a       |
| 5   | 136132686-136132721 | 5   | 4    | -56.8      | 57.4,87.2,74.1  | 47.1,7.9,3.2     | 0.01102     | 0.0252358  | Mknk1     |
| 5   | 136160604-136160687 | 7   | 3    | 19.8       | 3.1,0.0,1.2     | 19.5,23.6,20.3   | 0.000397944 | 0.0162422  | n/a       |
| 5   | 149435589-149435615 | 5   | 4    | -52.3      | 78.9,90.2,100.0 | 40.0,45.7,28.9   | 0.00103301  | 0.0162422  | n/a       |
| 6   | 12391051-12391125   | 15  | 12   | 24.9       | 39.3,44.6,44.7  | 71.5,59.8,77.5   | 0.0168846   | 0.0304455  | Fpp1r21   |
| 6   | 55087640-55087713   | 5   | 3    | -37.4      | 48.0,46.8,47.4  | 0.5,10.1,28.3    | 0.0209088   |            |           |

Table S3 – continued from previous page

| Chr | Start-End           | CpN | ΔCpN | Mean.Diff. | Control         | FeDef          | p(DMR)     | q(DMR, BH) | Gene     |
|-----|---------------------|-----|------|------------|-----------------|----------------|------------|------------|----------|
| 8   | 6090401-6090446     | 6   | 4    | 28.4       | 45.3,67.3,57.6  | 89.0,83.3,83.9 | 0.0245255  | 0.0336327  | n/a      |
| 8   | 12721284-12721410   | 9   | 7    | 50.1       | 16.7,5.4,0.0    | 72.3,51.1,47.5 | 0.004375   | 0.0182159  | Fat3     |
| 8   | 41254229-41254287   | 6   | 3    | 30.8       | 49.2,37.1,46.8  | 70.5,78.4,63.8 | 0.00230177 | 0.0162422  | n/a      |
| 8   | 51154948-51155149   | 5   | 2    | -18.3      | 50.3,55.6,52.3  | 15.2,50.8,34.1 | 0.186609   | 0.186609   | n/a      |
| 8   | 53698160-53698290   | 5   | 2    | 38.9       | 40.6,37.0,39.7  | 82.0,73.1,82.4 | 0.00239481 | 0.0162422  | n/a      |
| 8   | 65166756-65166792   | 6   | 6    | 28.1       | 71.2,63.6,72.9  | 98.8,99.6,97.4 | 0.00276201 | 0.0162422  | n/a      |
| 8   | 91817444-91817491   | 5   | 4    | -69.0      | 83.4,100.0,58.3 | 6.9,14.8,17.2  | 0.00962034 | 0.0242094  | Pgm3     |
| 8   | 104424662-104424727 | 9   | 4    | -10.7      | 34.9,32.0,25.3  | 21.4,18.6,18.7 | 0.0367213  | 0.0414245  | Armc8    |
| 8   | 107270544-107270587 | 5   | 3    | 33.2       | 16.4,0.0,0.0    | 47.5,43.9,7.9  | 0.0349745  | 0.0396494  | Ephb1    |
| 8   | 108640761-108640829 | 7   | 5    | 16.8       | 65.7,72.2,72.5  | 93.2,85.7,84.8 | 0.00282423 | 0.0162422  | n/a      |
| 8   | 125128537-125128625 | 5   | 4    | -48.9      | 85.0,84.5,94.8  | 55.1,28.6,55.4 | 0.0144395  | 0.0282406  | Mobp     |
| 8   | 127158930-127158988 | 5   | 2    | -25.0      | 47.0,29.9,28.6  | 0.0,15.2,10.0  | 0.0140888  | 0.0278133  | Klh40    |
| 9   | 9045295-9045389     | 6   | 3    | -29.0      | 61.6,67.1,58.9  | 26.1,48.7,38.4 | 0.0206041  | 0.0316667  | Guca1a   |
| 9   | 10483790-10483920   | 6   | 2    | 18.8       | 70.2,54.4,61.1  | 83.5,79.7,77.6 | 0.02386    | 0.0331148  | n/a      |
| 9   | 11436153-11436327   | 6   | 3    | -44.0      | 82.9,85.7,88.1  | 52.0,32.5,45.3 | 0.00937828 | 0.0241306  | n/a      |
| 9   | 18057850-18057912   | 5   | 3    | 22.6       | 3.2,0.0,0.0     | 29.1,19.5,5.1  | 0.0263564  | 0.0346874  | Tfap2b   |
| 9   | 31431836-31431978   | 6   | 2    | 24.2       | 40.7,24.7,33.2  | 50.8,62.6,48.1 | 0.0106525  | 0.0251486  | n/a      |
| 9   | 32492545-32492748   | 6   | 2    | -21.8      | 70.5,76.3,94.4  | 48.0,62.6,74.6 | 0.0567747  | 0.0585649  | Bag2     |
| 9   | 74595534-74595562   | 5   | 3    | -14.3      | 0.0,14.0,18.4   | 0.4,0.0,1.6    | 0.0481507  | 0.0508134  | Dnpep    |
| 9   | 77468091-77468349   | 5   | 2    | 10.0       | 76.3,88.7,71.8  | 91.7,89.5,89.1 | 0.141672   | 0.142293   | n/a      |
| 9   | 77904490-77904556   | 5   | 3    | 27.4       | 59.1,49.9,49.1  | 65.4,88.1,78.4 | 0.0263288  | 0.0346874  | Mogat1   |
| 9   | 91559815-91560325   | 5   | 3    | 36.2       | 53.0,42.4,32.8  | 77.1,75.9,72.7 | 0.0119306  | 0.0255446  | n/a      |
| 9   | 107124722-107125470 | 5   | 2    | -21.2      | 88.5,76.7,87.2  | 64.8,55.7,71.8 | 0.0122189  | 0.0259086  | Arhgap28 |
| X   | 90842868-90842894   | 6   | 6    | 31.4       | 33.2,21.1,40.5  | 50.0,71.2,65.4 | 0.00652632 | 0.0226444  | n/a      |
| X   | 90843046-90843140   | 12  | 9    | 32.4       | 33.3,20.3,23.1  | 76.3,48.5,51.2 | 0.0331123  | 0.0386873  | n/a      |
| X   | 122513987-122514019 | 6   | 3    | 28.8       | 69.0,57.4,70.0  | 96.6,96.1,94.0 | 0.00850166 | 0.0241306  | n/a      |
| X   | 130298607-130299446 | 7   | 2    | 10.8       | 59.1,61.6,52.3  | 61.9,72.9,65.0 | 0.0447212  | 0.0480806  | n/a      |
| X   | 160446080-160446146 | 5   | 5    | -55.2      | 59.0,97.1,93.8  | 31.4,34.9,28.1 | 0.0250428  | 0.0339338  | n/a      |
| X   | 160539343-160539409 | 6   | 3    | -38.2      | 78.5,100.0,74.9 | 64.9,30.9,65.2 | 0.0391317  | 0.0431     | n/a      |

| Gene                     | # CpG | ΔMethylation | Description                                                   |
|--------------------------|-------|--------------|---------------------------------------------------------------|
| Fkrp <sup>†1</sup>       | 10    | -77.7        | fukutin related protein                                       |
| Dip2a <sup>†2</sup>      | 10    | -57.3        | disco interacting protein 2 homolog A                         |
| Dpfl <sup>†3,4</sup>     | 10    | -20.6        | D4, zinc and double PHD fingers family 1                      |
| Usf2 <sup>†5</sup>       | 10    | -18.3        | upstream transcription factor 2                               |
| Lims2 <sup>†6,7</sup>    | 10    | -11.6        | LIM and senescent cell antigen like domains 2                 |
| Ncf1 <sup>†8</sup>       | 9     | -38.4        | neutrophil cytosolic factor 1                                 |
| Ush1g                    | 9     | -17.2        | Usher syndrome 1G                                             |
| Armc8 <sup>†9</sup>      | 9     | -10.7        | armadillo repeat containing 8                                 |
| Hint1 <sup>†10</sup>     | 8     | -25.1        | histidine triad nucleotide binding protein 1                  |
| Jak3 <sup>*†11</sup>     | 8     | -20.4        | Janus kinase 3                                                |
| Ppp1r3b <sup>*</sup>     | 7     | -19.4        | protein phosphatase 1, regulatory (inhibitor) subunit 3B      |
| Tall <sup>†12</sup>      | 7     | -35.1        | T cell acute lymphocytic leukemia 1                           |
| Arhgef3 <sup>*†13</sup>  | 6     | -19.8        | Rho guanine nucleotide exchange factor (GEF) 3                |
| Bag2 <sup>†14</sup>      | 6     | -21.8        | BCL2-associated athanogene 2                                  |
| Ss18l1 <sup>†15</sup>    | 6     | -18.6        | synovial sarcoma translocation gene on chromosome 18-like 1   |
| Adarb2 <sup>†16</sup>    | 6     | -19.7        | adenosine deaminase, RNA-specific, B2                         |
| Kif26b <sup>†17</sup>    | 6     | -44.2        | kinesin family member 26B                                     |
| Guca1a <sup>*†18</sup>   | 6     | -29.0        | guanylate cyclase activator 1a (retina)                       |
| Cds1                     | 6     | -27.8        | CDP-diacylglycerol synthase 1                                 |
| Dnaj2 <sup>†19</sup>     | 6     | -39.0        | DnaJ heat shock protein family (Hsp40) member A2              |
| Comm1 <sup>†20</sup>     | 6     | -40.4        | COMM domain containing 1                                      |
| St8sial1 <sup>†21</sup>  | 6     | -20.1        | ST8 alpha-N-acetylneuraminidase alpha-2,8-sialyltransferase 1 |
| Smyd3                    | 6     | -28.2        | SET and MYND domain containing 3                              |
| Dpf3 <sup>†4</sup>       | 6     | -13.3        | D4, zinc and double PHD fingers, family 3                     |
| Pon2 <sup>†22</sup>      | 6     | -10.0        | paraoxonase 2                                                 |
| Pgm3 <sup>*†23</sup>     | 5     | -69.0        | phosphoglucomutase 3                                          |
| Arhgap28 <sup>*†24</sup> | 5     | -21.2        | Rho GTPase activating protein 28                              |
| Mknk1 <sup>*†25</sup>    | 5     | -56.8        | MAP kinase-interacting serine/threonine kinase 1              |
| LOC691083                | 5     | -45.6        | Unknown                                                       |
| Slit3 <sup>†26</sup>     | 5     | -41.5        | slit homolog 3 (Drosophila)                                   |
| Tmem120b <sup>†27</sup>  | 5     | -37.7        | transmembrane protein 120B                                    |
| Klhl40 <sup>†28</sup>    | 5     | -25.0        | kelch-like 40                                                 |
| Pck1 <sup>*†29</sup>     | 5     | -48.2        | phosphoenolpyruvate carboxykinase 1, cytosolic                |
| Dnpep <sup>†30</sup>     | 5     | -14.3        | aspartyl aminopeptidase                                       |
| Mobp <sup>†31</sup>      | 5     | -48.9        | myelin-associated oligodendrocytic basic protein              |
| RGD735029                | 5     | -17.2        | Unknown                                                       |
| Trrap <sup>†32</sup>     | 5     | -28.2        | transformation/transcription domain-associated protein        |
| Tmem181 <sup>†33</sup>   | 5     | -47.1        | Unknown                                                       |
| Sardh <sup>†34</sup>     | 5     | -42.9        | sarcosine dehydrogenase                                       |
| Wiz <sup>†35</sup>       | 5     | -45.3        | widely-interspaced zinc finger motifs                         |
| Ust <sup>†36</sup>       | 5     | -54.1        | uronyl-2-sulfotransferase                                     |
| Arhgef15 <sup>†37</sup>  | 5     | -41.6        | Rho guanine nucleotide exchange factor (GEF) 15               |
| Sh3pxd2a <sup>†38</sup>  | 5     | -39.4        | SH3 and PX domains 2A                                         |

Table S4: DMRs showing decreased methylation from an Fe-deficient diet in rat hippocampus data. DMRs are associated with genes based on a promoter cutoff of 15,000 nucleotides. Gene names are from MGI.

\*Has role in GTPases and nucleotide exchange.

†Is associated with the hippocampus, neurons, and/or brain, with relevant literature cited.

| Gene                           | # CpG | ΔMethylation | Description                                                                                    |
|--------------------------------|-------|--------------|------------------------------------------------------------------------------------------------|
| Tnni1 <sup>†39</sup>           | 31    | 29.8         | troponin I, skeletal, slow 1                                                                   |
| Usp36 <sup>†40</sup>           | 21    | 28.8         | ubiquitin specific peptidase 36                                                                |
| Ppp1r21/Ccdc128* <sup>41</sup> | 15    | 24.9         | protein phosphatase 1, regulatory subunit 21                                                   |
| Clvs1                          | 11    | 26.5         | clavesin 1                                                                                     |
| Map3k11* <sup>†42</sup>        | 10    | 12.9         | mitogen-activated protein kinase kinase kinase 11                                              |
| Cank2b <sup>†43</sup>          | 9     | 19.3         | calcium/calmodulin-dependent protein kinase II, beta                                           |
| Iqcg <sup>†44</sup>            | 9     | 52.6         | IQ motif containing G                                                                          |
| Gucy2c* <sup>†45</sup>         | 9     | 86.6         | guanylate cyclase 2c                                                                           |
| Armc3 <sup>†46</sup>           | 8     | 43.1         | armadillo repeat containing 3                                                                  |
| Spon1 <sup>†47</sup>           | 8     | 73.6         | spondin 1, (f-spondin) extracellular matrix protein                                            |
| Jph3 <sup>†48</sup>            | 8     | 25.1         | junctophilin 3                                                                                 |
| Slc5a1 <sup>†49</sup>          | 7     | 37.4         | solute carrier family 5 (sodium/glucose cotransporter), member 1                               |
| Kctd6 <sup>†50</sup>           | 7     | 27.3         | potassium channel tetramerisation domain containing 6                                          |
| Chd2 <sup>†51</sup>            | 7     | 59.7         | chromodomain helicase DNA binding protein 2                                                    |
| Capn12 <sup>†52</sup>          | 7     | 21.5         | calpain 12                                                                                     |
| Scrt2 <sup>†53</sup>           | 6     | 36.8         | scratch homolog 2, zinc finger protein (Drosophila)                                            |
| Mrpl19 <sup>†54</sup>          | 6     | 23.9         | mitochondrial ribosomal protein L19                                                            |
| Tbc1d20 <sup>†55</sup>         | 6     | 13.5         | TBC1 domain family, member 20                                                                  |
| Ak4* <sup>†56</sup>            | 6     | 56.0         | adenylate kinase 4                                                                             |
| Kctd15 <sup>†57</sup>          | 6     | 55.1         | potassium channel tetramerisation domain containing 15                                         |
| Bcl11b <sup>†4</sup>           | 6     | 44.7         | B cell leukemia/lymphoma 11B                                                                   |
| Mib1 <sup>†58</sup>            | 6     | 48.9         | mindbomb homolog 1 (Drosophila)                                                                |
| Sbk1* <sup>†59</sup>           | 6     | 39.5         | SH3-binding kinase 1                                                                           |
| Pde6c* <sup>†60</sup>          | 6     | 46.1         | phosphodiesterase 6C, cGMP specific, cone, alpha prime                                         |
| Marveld2 <sup>†</sup>          | 6     | 17.9         | MARVEL (membrane-associating) domain containing 2                                              |
| Ric8b <sup>†61</sup>           | 6     | 42.0         | resistance to inhibitors of cholinesterase 8 homolog B (C. elegans)                            |
| Arf1 <sup>†62</sup>            | 6     | 17.8         | ADP-ribosylation factor 1                                                                      |
| Myo3b <sup>†63</sup>           | 5     | 17.1         | myosin IIIB                                                                                    |
| Dgki* <sup>†64</sup>           | 5     | 51.3         | diacylglycerol kinase, iota                                                                    |
| Unc93b1                        | 5     | 54.8         | unc-93 homolog B1 (C. elegans)                                                                 |
| Rev3l                          | 5     | 16.7         | REV3-like, catalytic subunit of DNA polymerase zeta RAD54 like (S. cerevisiae)                 |
| Foxb2                          | 5     | 32.6         | forkhead box B2                                                                                |
| Olr987                         | 5     | 21.1         | Unknown                                                                                        |
| Prkar1b* <sup>†65</sup>        | 5     | 40.2         | protein kinase, cAMP dependent regulatory, type I beta                                         |
| Btbd9 <sup>†66</sup>           | 5     | 23.6         | BTB (POZ) domain containing 9                                                                  |
| Riok2*                         | 5     | 48.0         | RIO kinase 2 (yeast)                                                                           |
| Pde2a <sup>†67</sup>           | 5     | 28.6         | phosphodiesterase 2A, cGMP-stimulated                                                          |
| Itsn1 <sup>†68</sup>           | 5     | 29.8         | intersectin 1 (SH3 domain protein 1A)                                                          |
| Mc3r                           | 5     | 42.2         | melanocortin 3 receptor                                                                        |
| Ptpn14*                        | 5     | 30.1         | protein tyrosine phosphatase, non-receptor type 14                                             |
| B4galnt3                       | 5     | 31.8         | beta-1,4-N-acetyl-galactosaminyl transferase 3                                                 |
| Fat3                           | 5     | 62.8         | FAT atypical cadherin 3                                                                        |
| Kank3                          | 5     | 28.7         | KN motif and ankyrin repeat domains 3                                                          |
| Ankrd13a                       | 5     | 26.8         | ankyrin repeat domain 13a                                                                      |
| Tfap2b                         | 5     | 22.6         | transcription factor AP-2 beta                                                                 |
| Cog3                           | 5     | 27.4         | component of oligomeric golgi complex 3                                                        |
| Macrocl1                       | 5     | 35.4         | MACRO domain containing 1                                                                      |
| Ezr                            | 5     | 51.9         | ezrin                                                                                          |
| Arhgap31*                      | 5     | 36.8         | Rho GTPase activating protein 31                                                               |
| Mogat1                         | 5     | 27.4         | monoacylglycerol O-acyltransferase 1                                                           |
| Srgap2*                        | 5     | 28.6         | SLIT-ROBO Rho GTPase activating protein 2                                                      |
| Tenm2                          | 5     | 42.5         | teneurin transmembrane protein 2                                                               |
| Pabpn1l                        | 5     | 33.3         | poly(A)binding protein nuclear 1-like                                                          |
| Slc38a1                        | 5     | 38.2         | solute carrier family 38, member 1                                                             |
| Tgif2                          | 5     | 32.2         | TGFB-induced factor homeobox 2                                                                 |
| Hip1r                          | 5     | 56.4         | huntingtin interacting protein 1 related                                                       |
| Cacna1c                        | 5     | 27.9         | calcium channel, voltage-dependent, L type, alpha 1C subunit                                   |
| Aebp1                          | 5     | 10.5         | AE binding protein 1                                                                           |
| Fig4*                          | 5     | 47.9         | FIG4 phosphoinositide 5-phosphatase                                                            |
| Snurf                          | 5     | 34.7         | SNRPN upstream reading frame                                                                   |
| Adamts19                       | 5     | 58.5         | a disintegrin-like and metallopeptidase (reprolysin type) with thrombospondin type 1 motif, 19 |
| Ephb1                          | 5     | 33.2         | Eph receptor B1                                                                                |

Table S5: DMRs showing increased methylation from rat hippocampus data. Gene names are from MGI. Has role in GTPases and nucleotide exchange. <sup>†</sup>is associated with calmodulin in Hematopoiesis



## S4 Effects of Parameters on Number of DMRs Identified in Rat Hippocampus

| Option                                                     | Default value when not specified |
|------------------------------------------------------------|----------------------------------|
| minimum coverage                                           | 10                               |
| difference of methylation percentage                       | 10.000000                        |
| p-value                                                    | 0.05                             |
| minimum number of CpN                                      | 5                                |
| minimum range of the differentially methylated nucleotides | 0                                |
| maximum range between CpN                                  | 20,000                           |
| non-differentially methylated CpG count for extension      | 5                                |

Table S6: Parameters used for evaluating individual and combined parameters. All images in this section show two parameters varied as all others are set to default values.

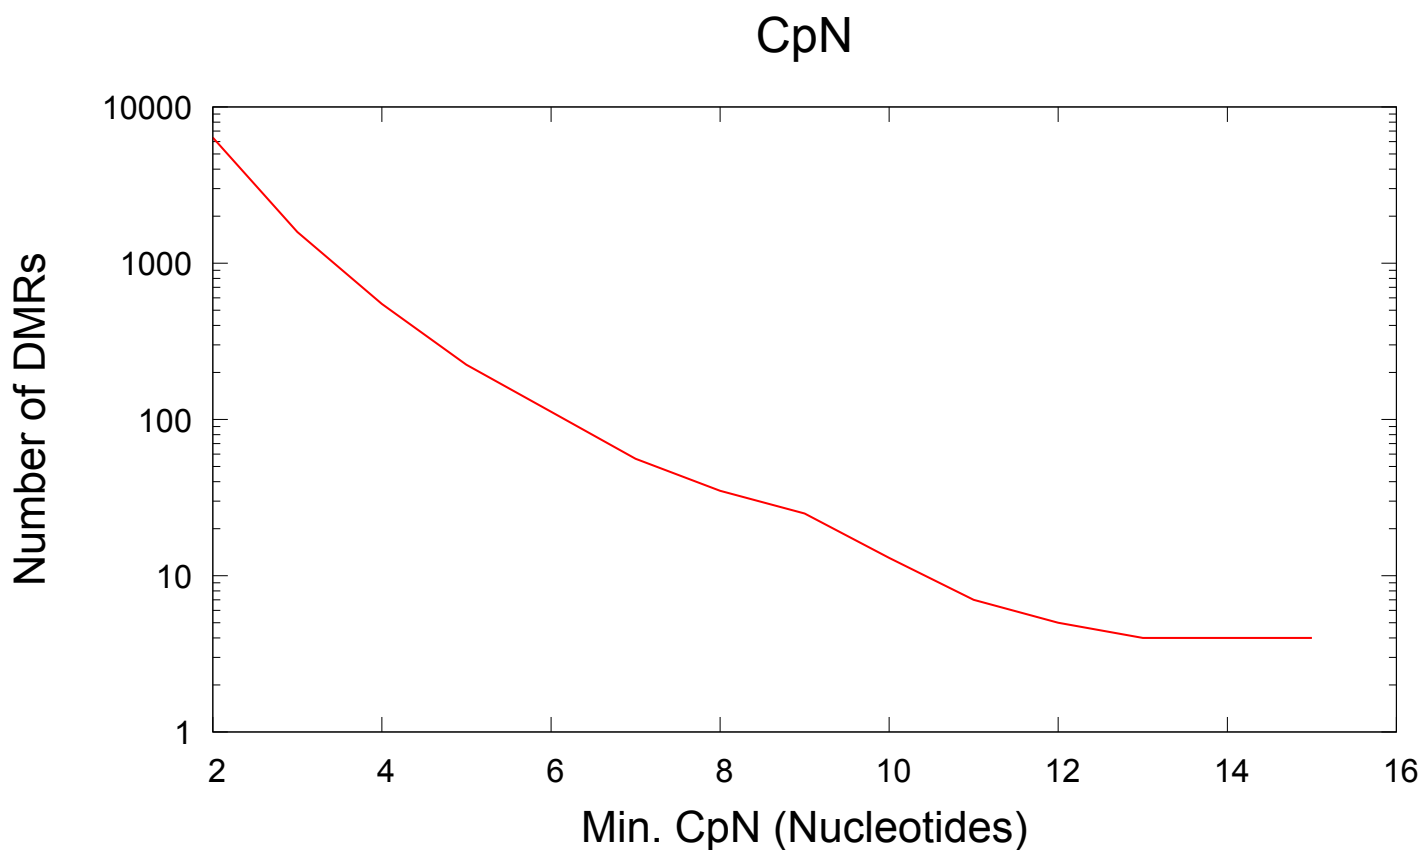

Figure S2: DMRs counted as a function of minimum CpN, with all other options held constant as indicated in Table S6. This plot is made with GNUPlot using the Perl script plot\_results.pl which is included with Defiant. Lower minimum CpN counts show more and often shorter DMRs.

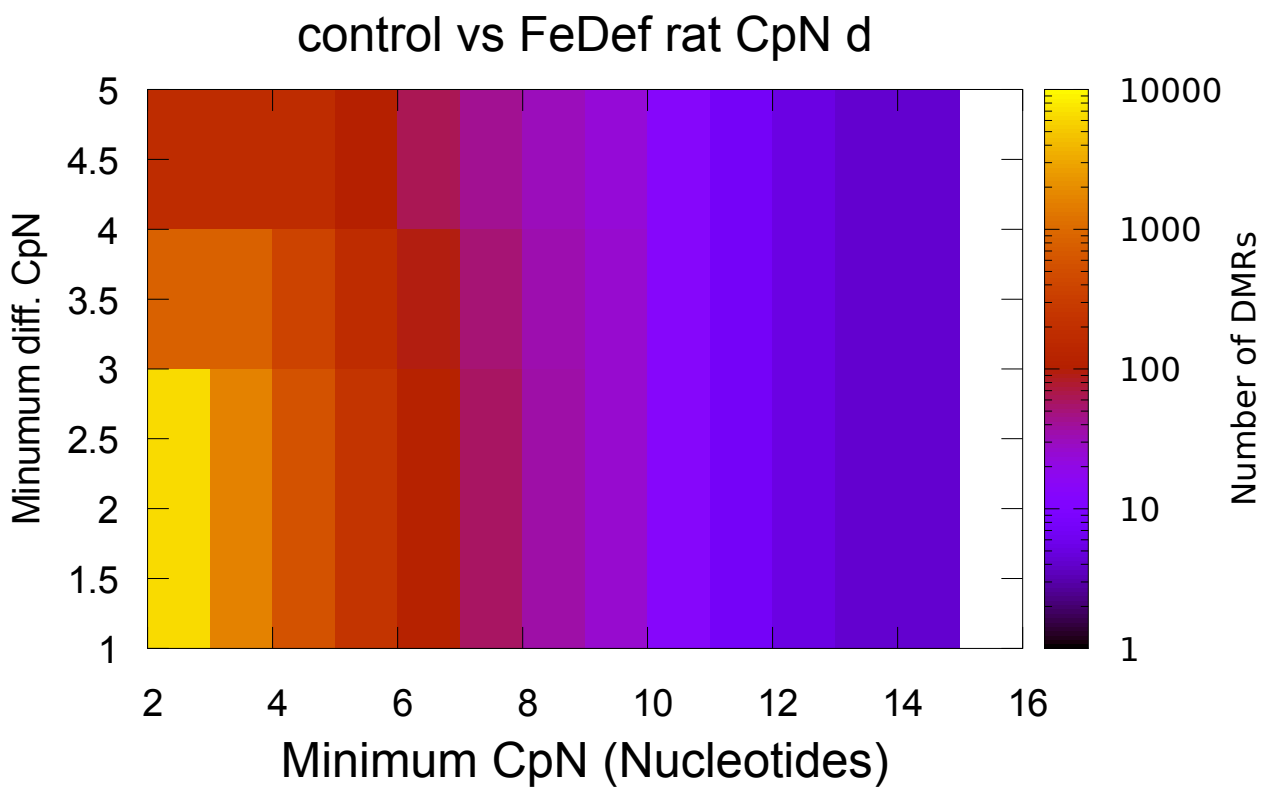

Figure S3: DMRs in rat hippocampus counted as a function of CpN and differentially methylated CpN (d), with all other parameters held constant as indicated in Table S6. This plot is made with GNUPlot using the Perl script plot\_results.pl which is included with Defiant. Similar sharp decreases in DMR count occur as in Figure S2.

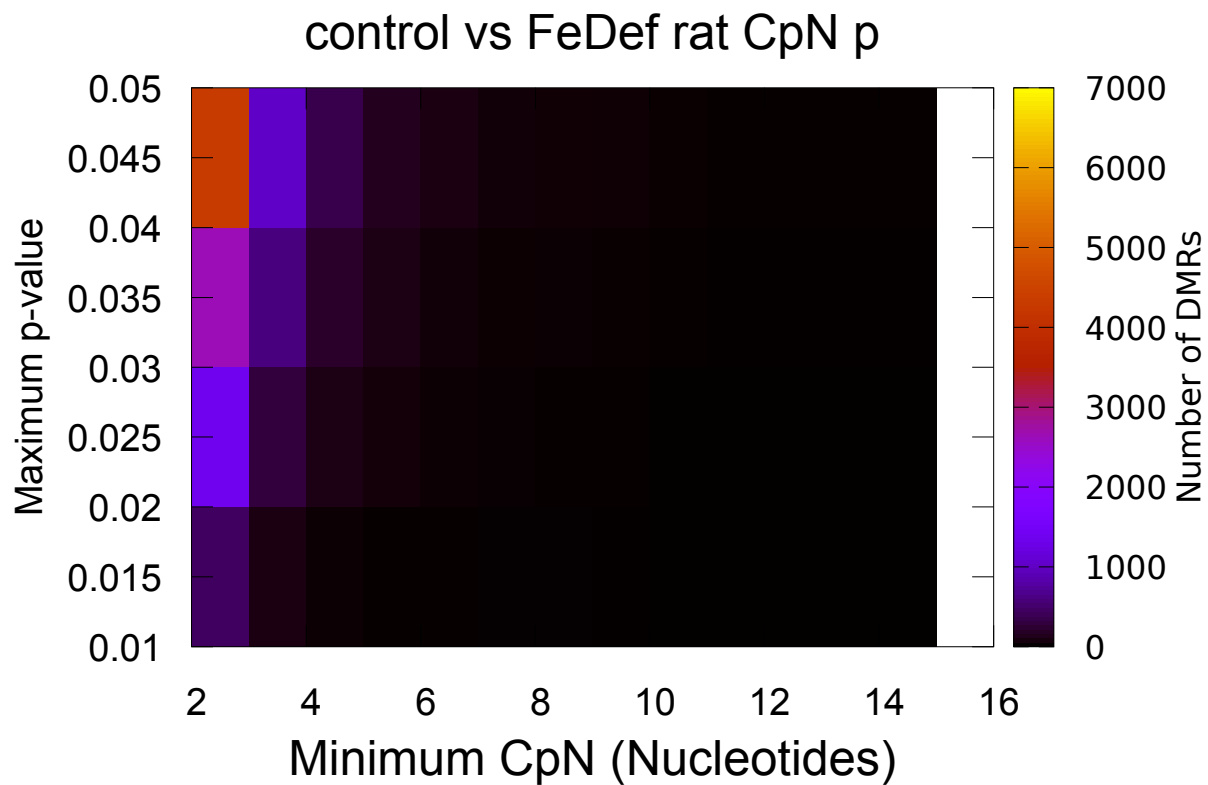

Figure S4: DMRs in rat hippocampus counted as a function of CpN and  $p$ -value with all other parameters held constant as indicated in Table S6. This plot is made with GNUPlot using the Perl script plot\_results.pl which is included with Defiant. Low  $p$ -value and low CpN will give a high DMR count, but many are likely false positives.

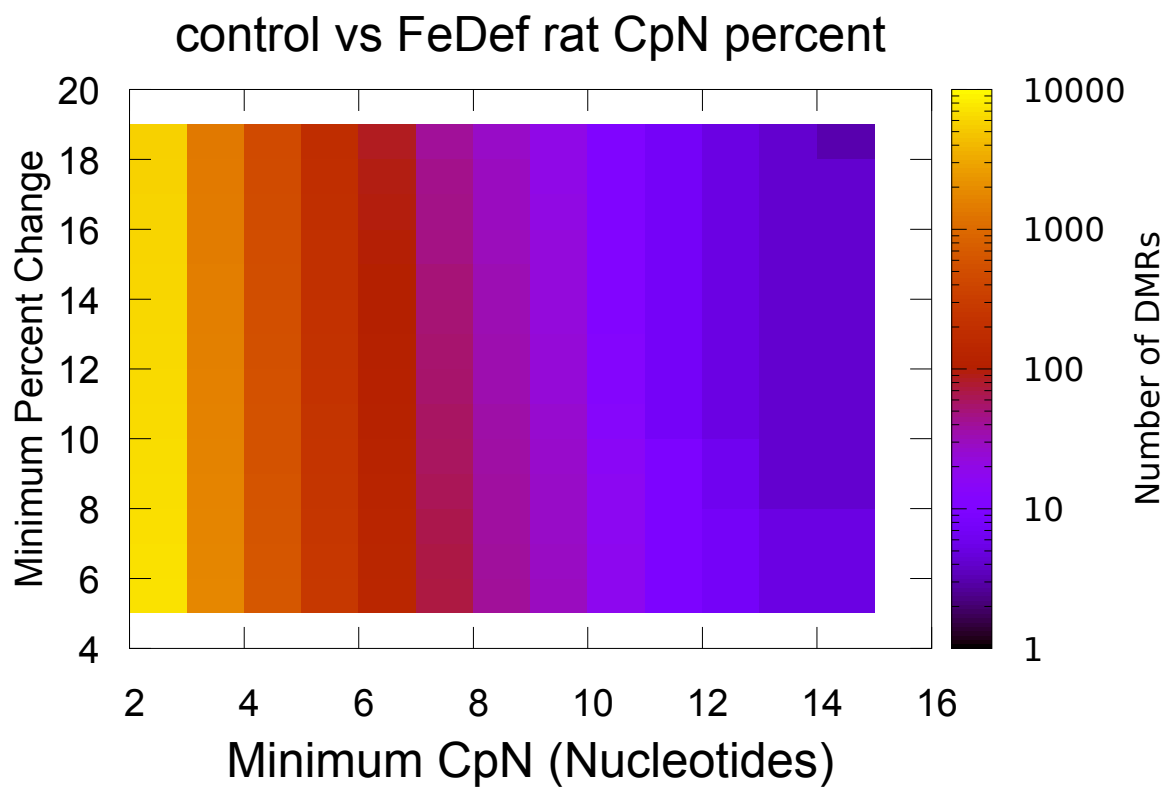

Figure S5: DMRs in rat hippocampus counted as a function of CpN & minimum percent cutoff. All other parameters held constant as indicated in Table S6. This plot is made with GNUPlot using the Perl script plot\_results.pl which is included with Defiant. CpN appears to be more important than minimum percent change.

## Coverage

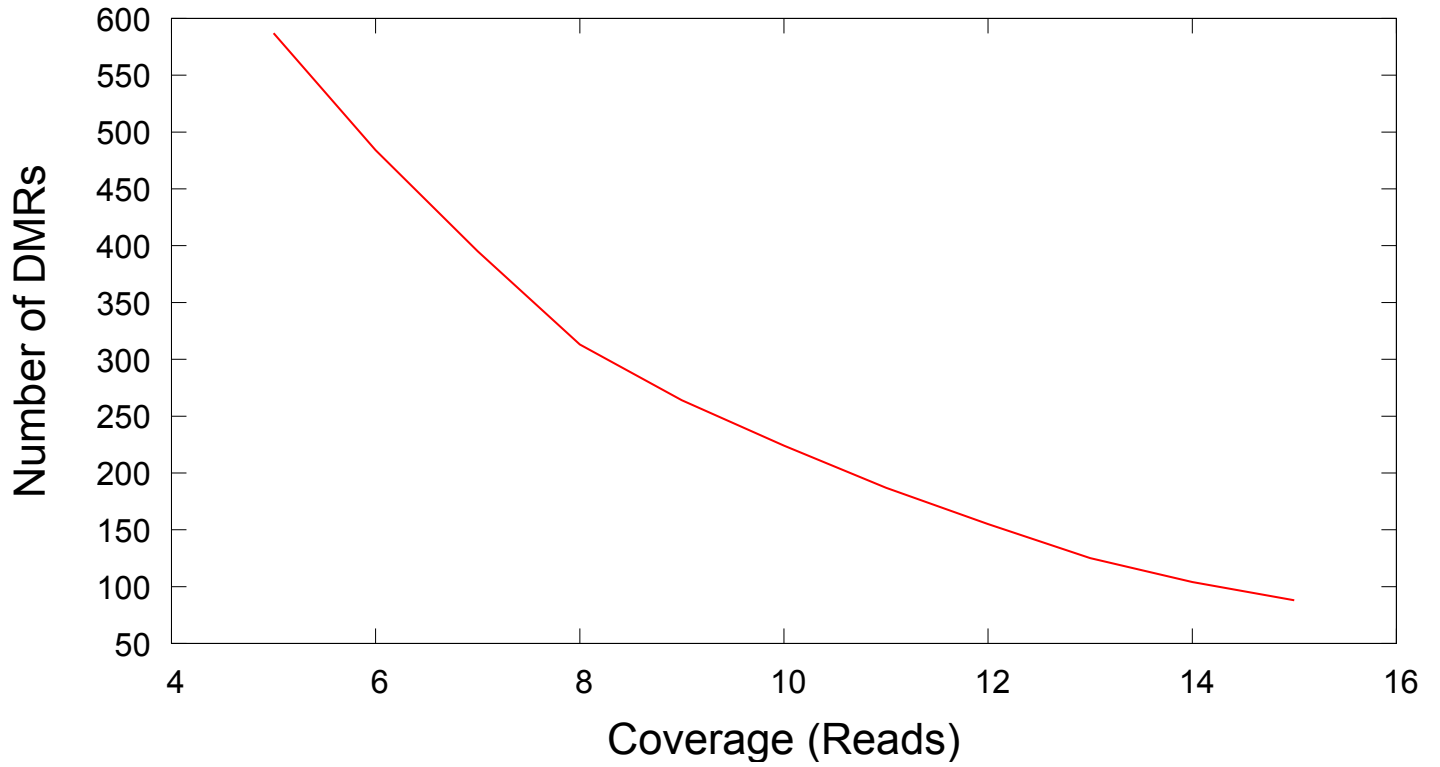

Figure S6: Minimum coverage influences the number of DMRs found in the rat hippocampus with all other parameters set constant as in Table S6. This plot is made with GNUPlot using the Perl script plot\_results.pl which is included with Defiant. Low coverage has higher sensitivity, but poorer selectivity, while high coverage will have better sensitivity, but poorer selectivity.

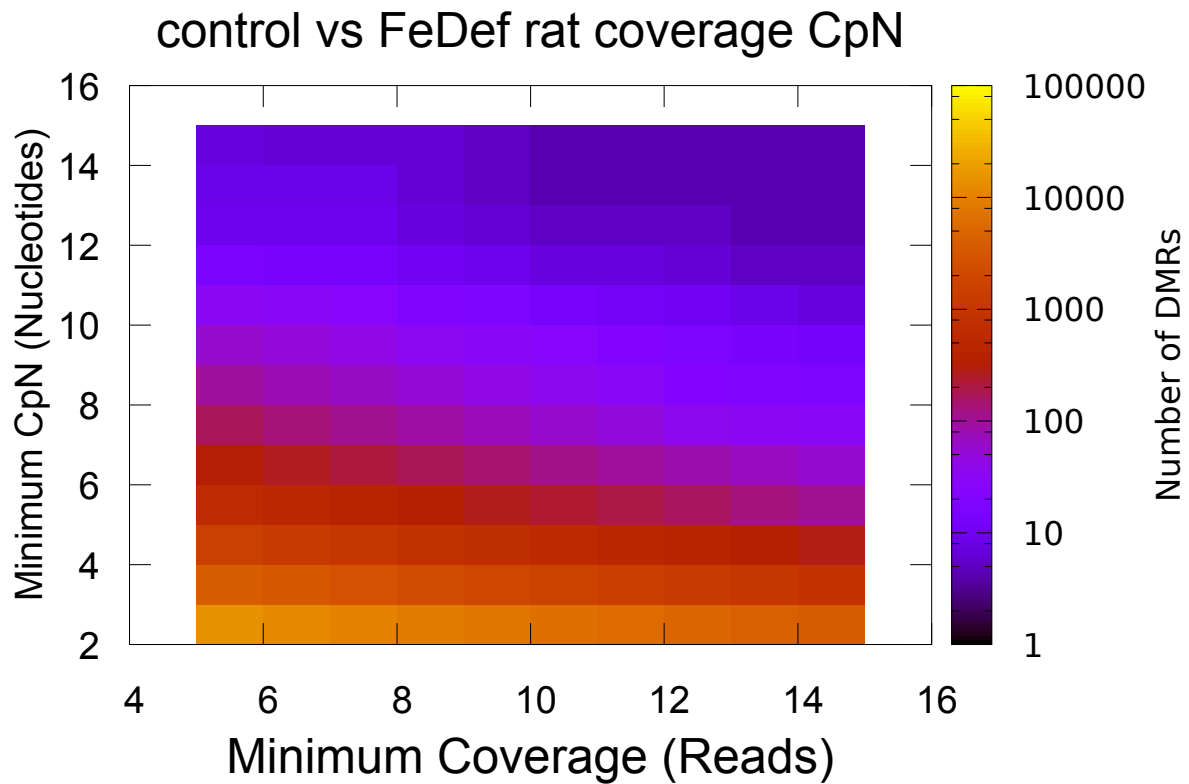

Figure S7: A sample graph showing number of DMRs found in the rat hippocampus as a function of minimum coverage and minimum CpN. All parameters but coverage and CpN are set as in Table S6. This plot is made with GNUPlot using the Perl script plot\_results.pl which is included with Defiant. Both exponentially increase the number of DMRs, which necessitates a logarithmic scale.

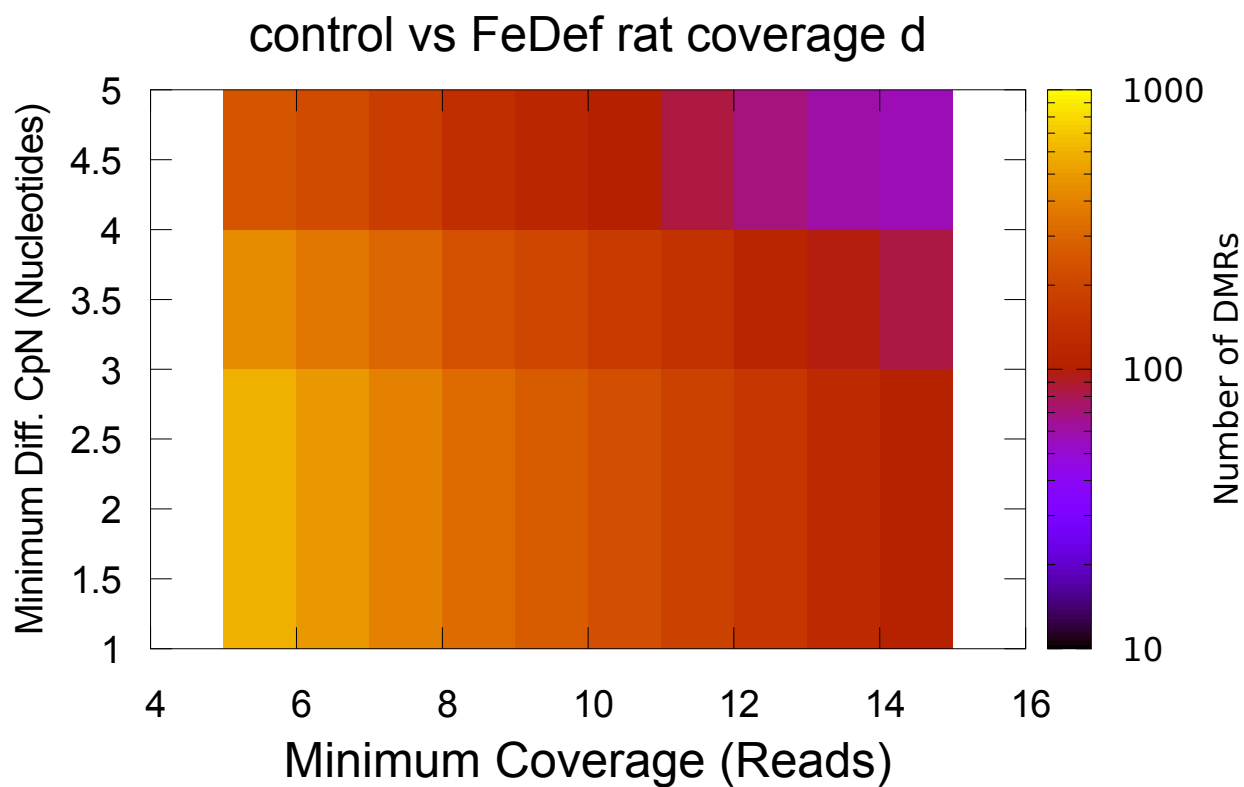

Figure S8: Minimum coverage and minimum differential CpN work similarly together to determine the DMR count in the rat hippocampus. All other parameters held constant as indicated in Table S6. This plot is made with GNUPlot using the Perl script plot\_results.pl which is included with Defiant.

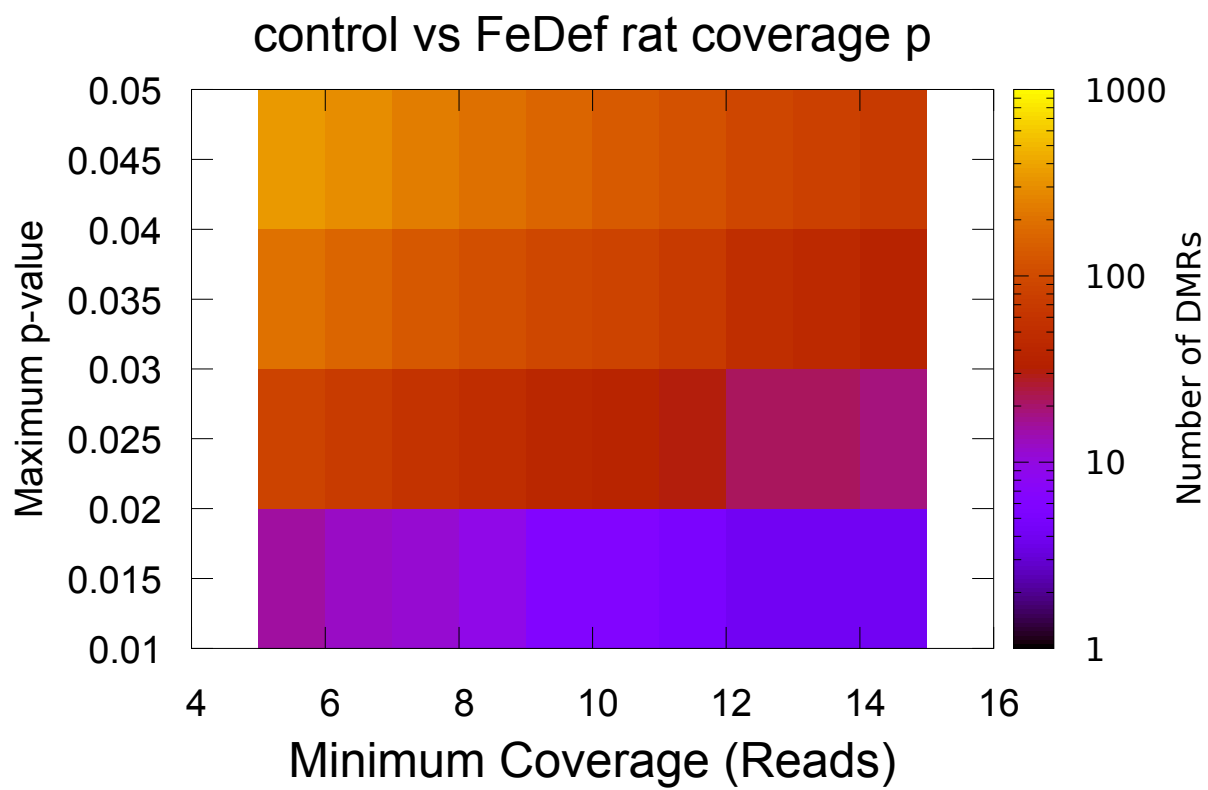

Figure S9: Minimum coverage and  $p$  value influence the number of DMRs found in the rat hippocampus. All other parameters held constant as indicated in Table S6. This plot is made with GNUPlot using the Perl script plot\_results.pl which is included with Defiant.  $P$ -value appears slightly more important than coverage in determining DMR count.



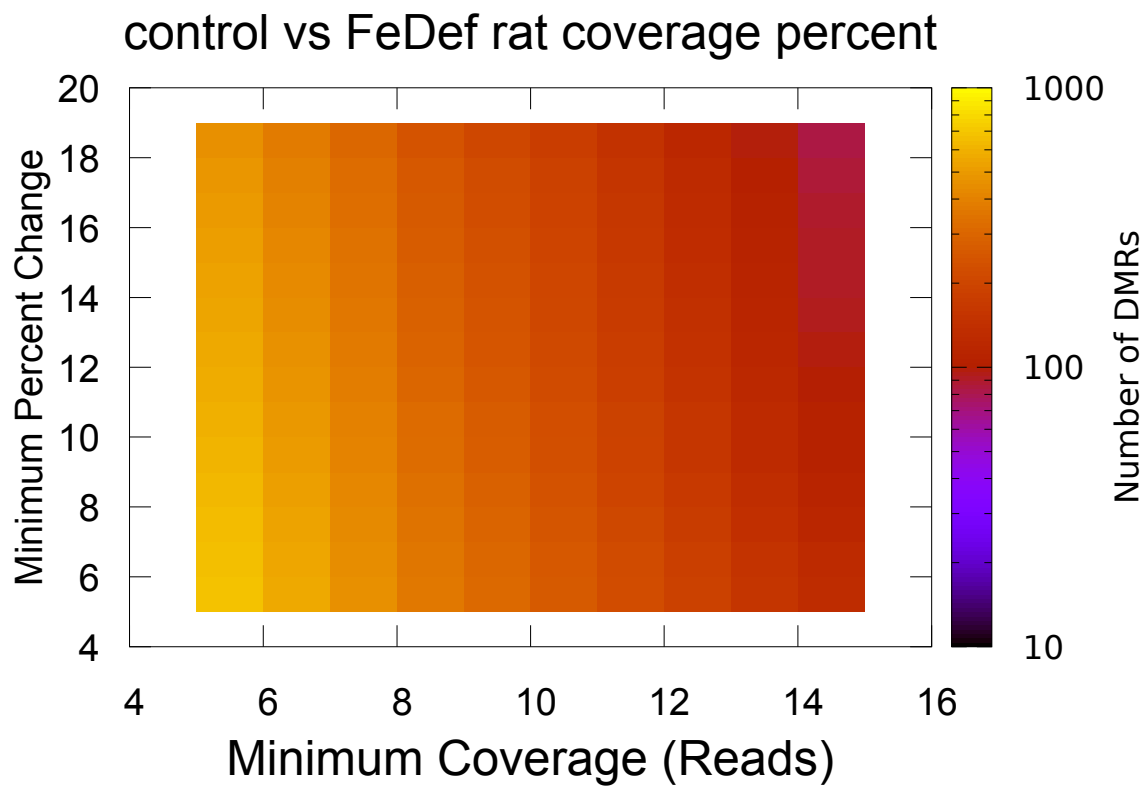

Figure S10: The number of DMRs found in the rat hippocampus is influenced by the minimum coverage and the minimum percent cutoff. All other parameters held constant as indicated in Table S6. This plot is made with GNUPlot using the Perl script plot\_results.pl which is included with Defiant.

d

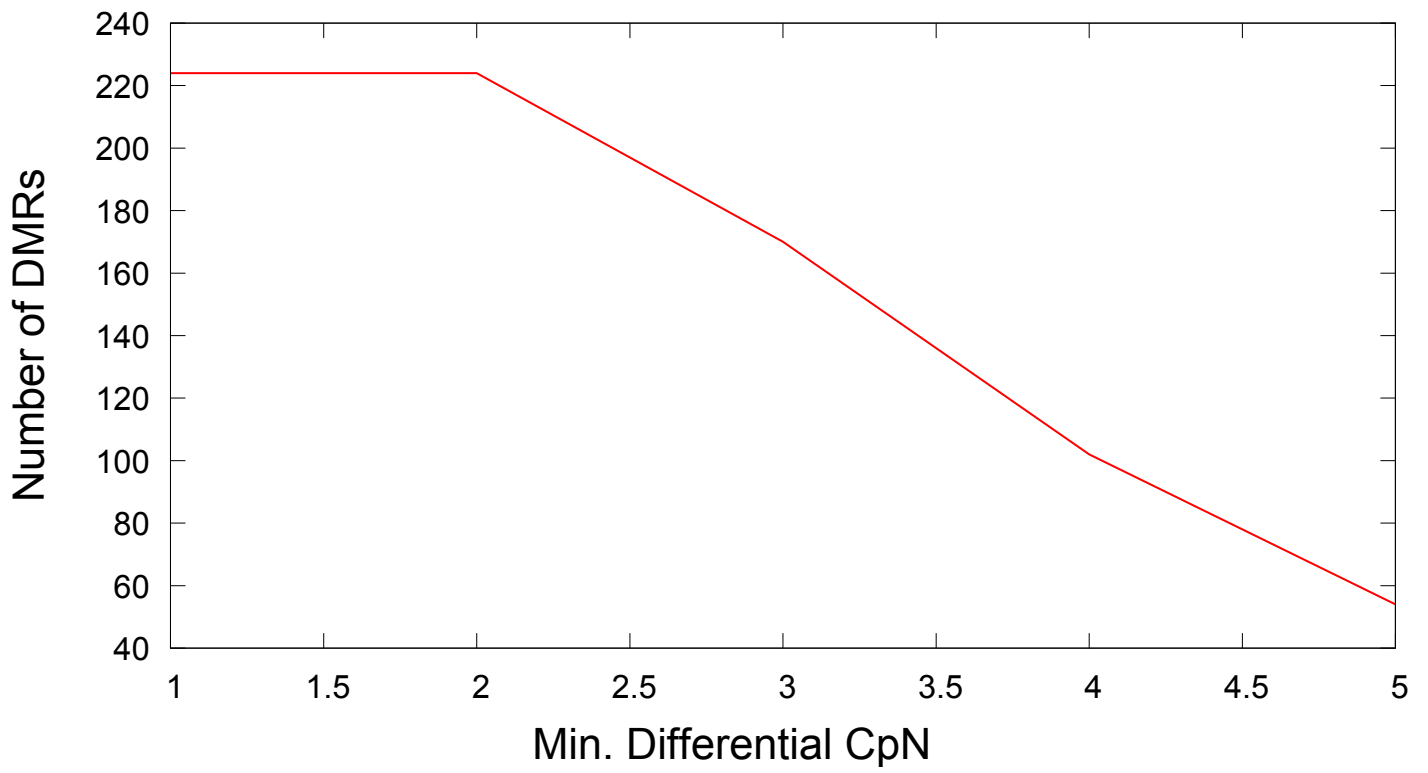

Figure S11: How the minimum number of differentially methylated CpN influences the number of DMRs in the rat data. All other parameters are held constant as in Table S6. This plot is made with GNUPlot using the Perl script plot\_results.pl which is included with Defiant.

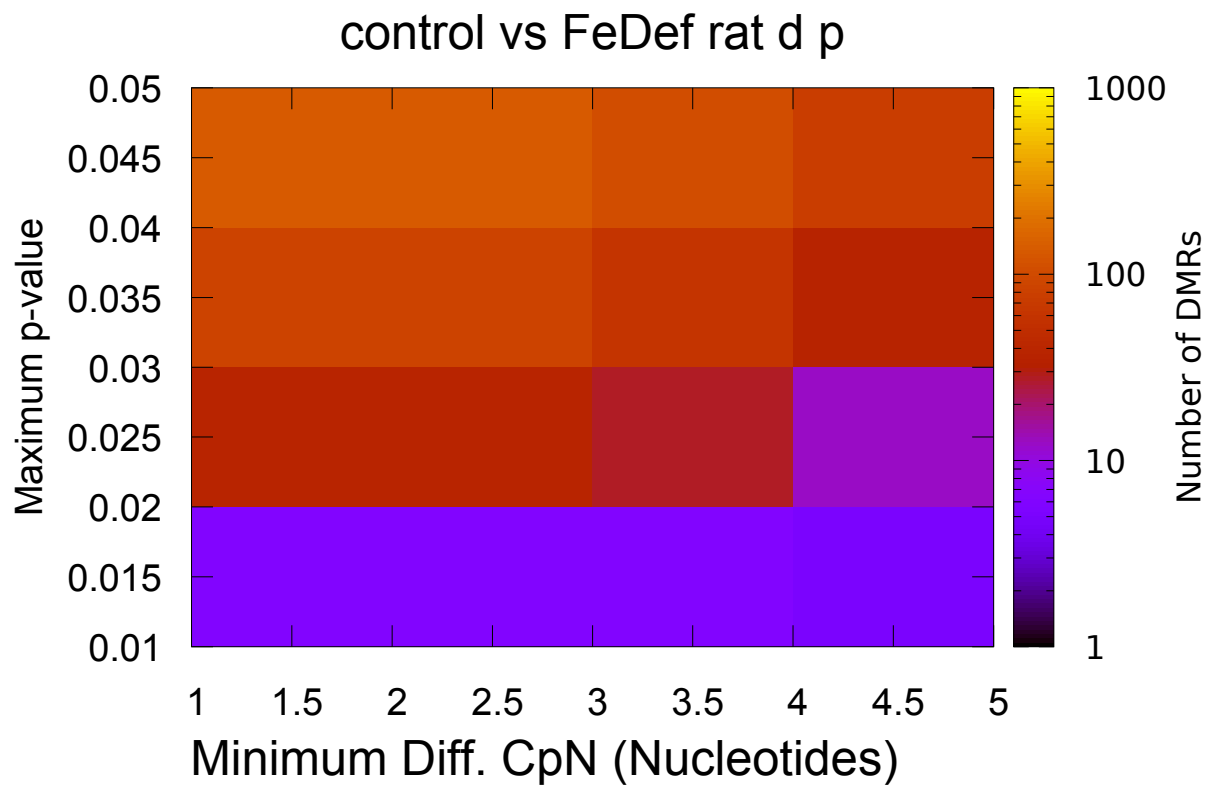

Figure S12: The minimum number of differentially methylated CpN “d” and the maximum  $p$ -value influence the number of DMRs found in the rat hippocampus. All other parameters held constant as indicated in Table S6. This plot is made with GNUPlot using the Perl script plot\_results.pl which is included with Defiant.

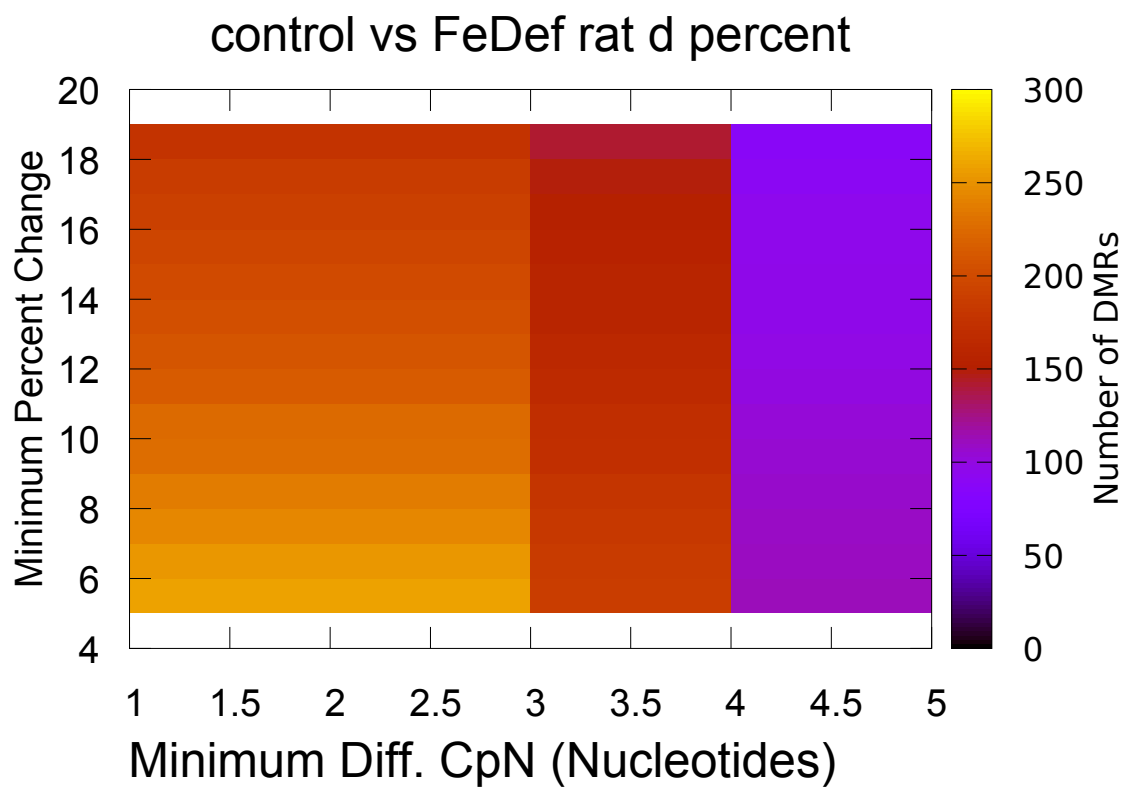

Figure S13: The minimum number of differentially methylated CpN “d” and the minimum percent change influence the number of DMRs found in the rat hippocampus. All other parameters held constant as indicated in Table S6. This plot is made with GNUPlot using the Perl script plot\_results.pl which is included with Defiant.

## Max. p-value

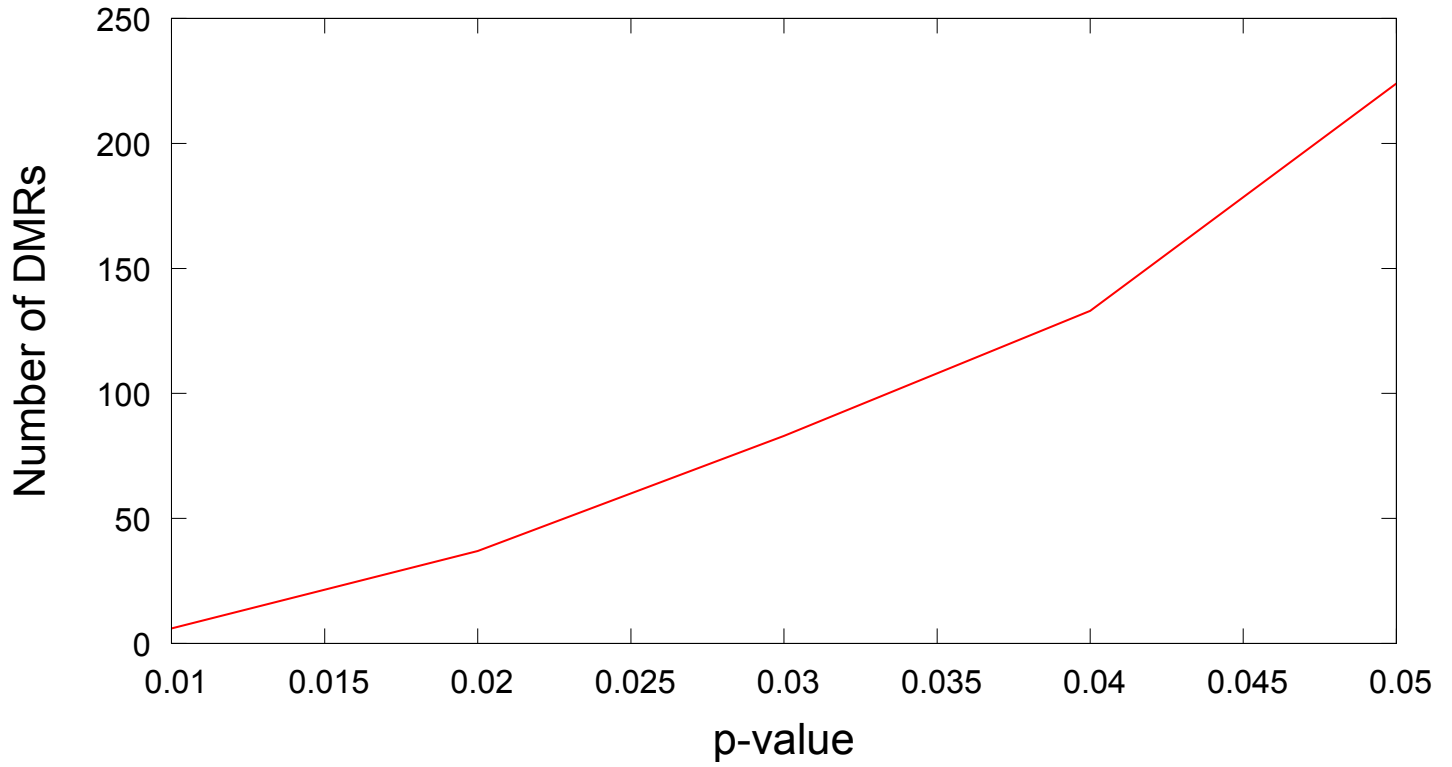

Figure S14: Maximum  $p$ -values display the expected behavior, with higher selectivity at lower  $p$  and higher sensitivity at higher  $p$ . All other parameters are held to values shown in Table S6.

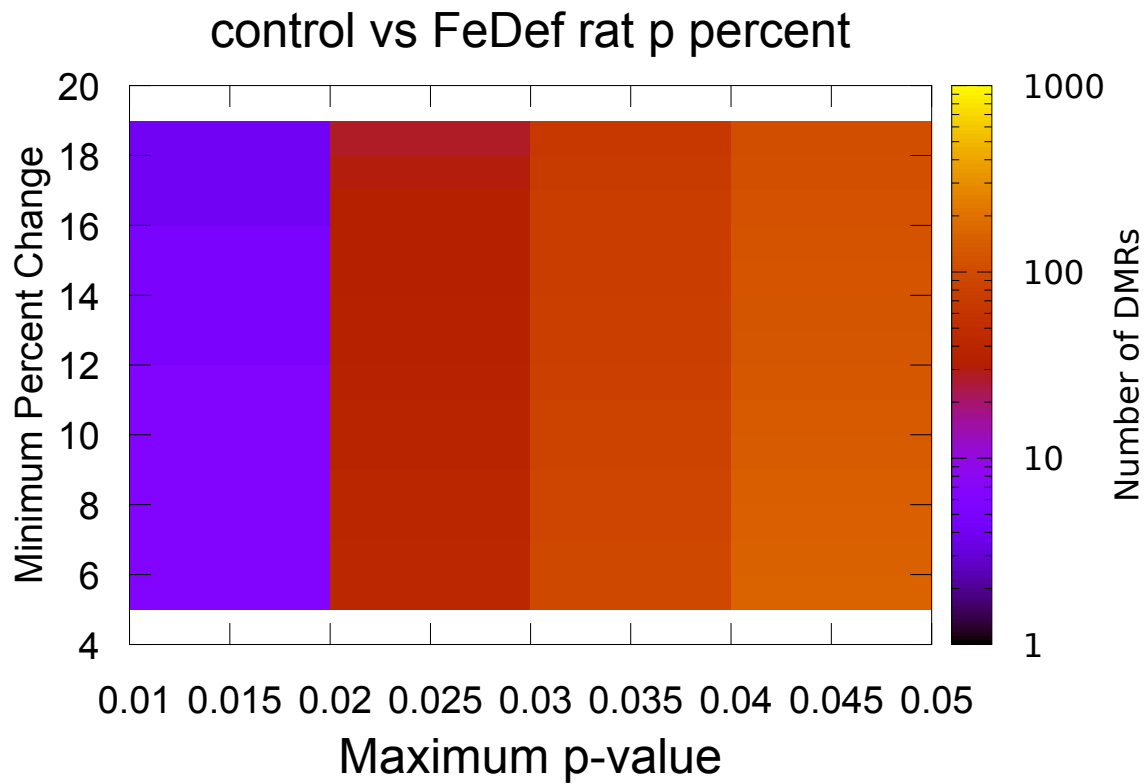

Figure S15: The maximum  $p$ -value and the minimum percent change influence the number of DMRs found in the rat hippocampus. The  $p$ -value appears to have a stronger influence on the number of DMRs found than the minimum percent cutoff. All other parameters held constant as indicated in Table S6. This plot is made with GNUPlot using the Perl script plot\_results.pl which is included with Defiant.

## Minimum Percent Change

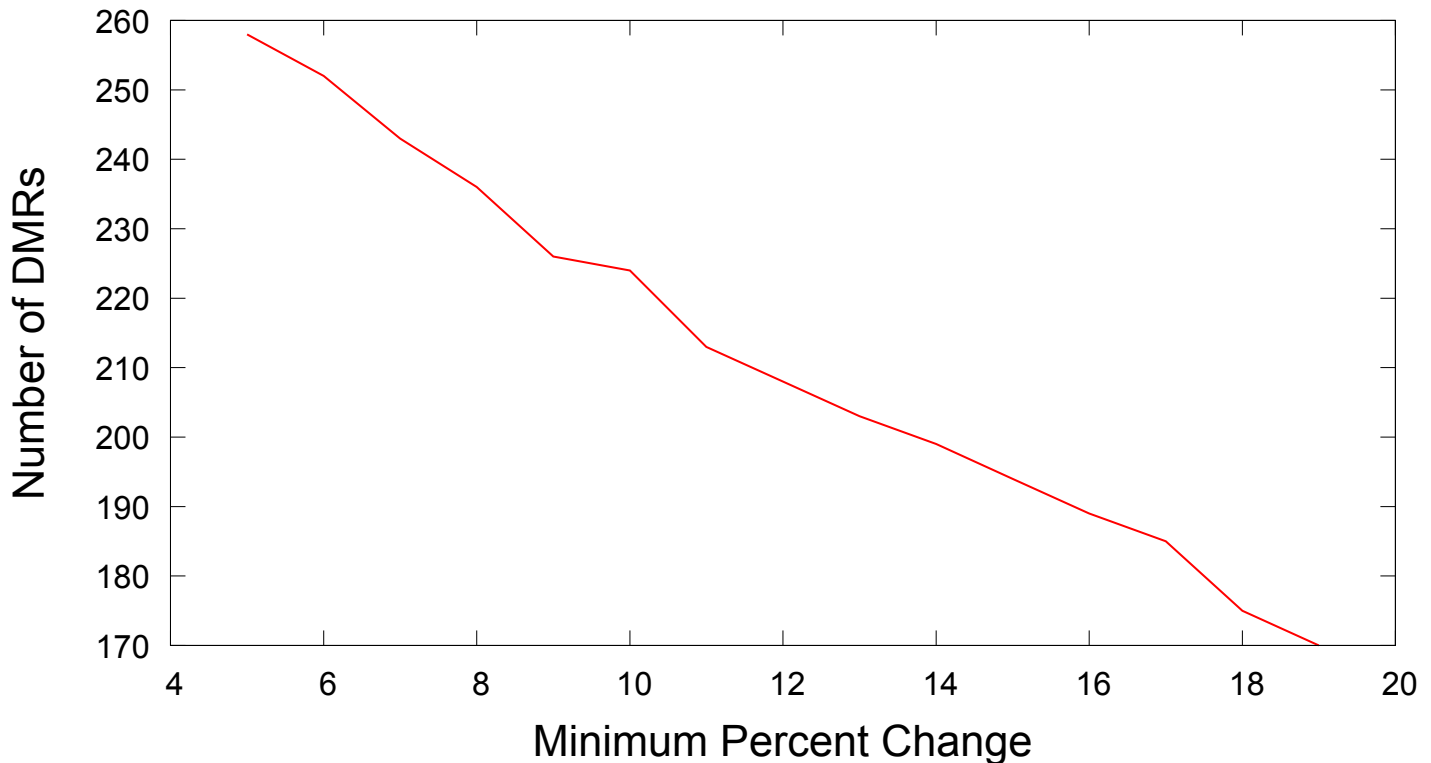

Figure S16: Minimum percent change influences the number of DMRs found. Larger minimum percent cutoffs show fewer DMRs, while there will be more DMRs showing smaller minimum percent cutoffs. All other parameters are held to values shown in Table S6.

## References

- <sup>1</sup> Beltran-Valero de Bernabé, D.; Voit, T.; Longman, C.; Steinbrecher, A.; Straub, V.; Yuva, Y.; Herrmann, R.; Sperner, J.; Korenke, C.; Diesen, C.; Dobyys, W. B.; Brunner, H. G.; van Bokhoven, H.; Brockington, M.; Muntoni, F. *J. Med. Genet.* **2004**, *41*(5), e61.
- <sup>2</sup> Kong, R.; Shao, S.; Wang, J.; Zhang, X.; Guo, S.; Zou, L.; Zhong, R.; Lou, J.; Zhou, J.; Zhang, J.; Song, R. *Am. J. Med. Genet. Part B: Neuropsychiatric Genetics* **2016**, *171*(2), 203–208.
- <sup>3</sup> Yoo, A. S.; Staahl, B. T.; Chen, L.; Crabtree, G. R. *Nature* **2009**, *460*, 642–646.
- <sup>4</sup> Hota, S. K.; Bruneau, B. G. *Development* **2016**, *143*(16), 2882–2897.
- <sup>5</sup> Nicolas, G.; Bennoun, M.; Devaux, I.; Beaumont, C.; Grandchamp, B.; Kahn, A.; Vaulont, S. *Proc. Natl. Acad. Sci. U.S.A.* **2001**, *98*(15), 8780–8785.
- <sup>6</sup> Cocks, G.; Wilde, J. I.; Graham, S. J.; Bousgouni, V.; Virley, D.; Lovestone, S.; Richardson, J. *J. Alzheimers Dis.* **2010**, *19*(2), 631–646.
- <sup>7</sup> Mastaitis, J.; Min, S.; Elvert, R.; Kannt, A.; Xin, Y.; Ochoa, F.; Gale, N. W.; Valenzuela, D. M.; Murphy, A. J.; Yancopoulos, G. D.; Gromada, J. *Proc. Natl. Acad. Sci. U.S.A.* **2015**, *112*(6), 1845–1849.
- <sup>8</sup> Schiavone, S.; Jaquet, V.; Sorce, S.; Dubois-Dauphin, M.; Hultqvist, M.; Backdahl, L.; Holmdahl, R.; Colaianna, M.; Cuomo, V.; Trabace, L.; Krause, K.-H. *Transl Psychiatry* **2012**, *2*.
- <sup>9</sup> Guerrieri, D.; Praag, H. *Oncotarget* **2015**, *6*(21).
- <sup>10</sup> Liu, Q.; Puche, A. C.; Wang, J. B. *Neurochem. Res.* **2008**, *33*(7), 1263–1276.
- <sup>11</sup> Feldker, D. E. M.; Datson, N. A.; Veenema, A. H.; Meulmeester, E.; De Kloet, E. R.; Vreugdenhil, E. *Eur. J. Neurosci.* **2003**, *17*(2), 379–387.

- <sup>12</sup> Achim, K.; Peltopuro, P.; Lahti, L.; Tsai, H.-H.; Zachariah, A.; Åstrand, M.; Salminen, M.; Rowitch, D.; Partanen, J. *BiO* **2013**.
- <sup>13</sup> Thiesen, S.; Kübart, S.; Ropers, H.-H.; Nothwang, H. *Biochem. Biophys. Res. Commun.* **2000**, *273*(1), 364 – 369.
- <sup>14</sup> Patil, S. P.; Tran, N.; Geekiyana, H.; Liu, L.; Chan, C. *Neurosci. Lett.* **2013**, *554*, 121 – 125.
- <sup>15</sup> Möller, A. *The protein SS18L1 is a potent suppressor of polyQ-mediated huntingtin aggregation and toxicity* PhD thesis, Universität zu Berlin, **2012**.
- <sup>16</sup> Melcher, T.; Maas, S.; Herb, A.; Sprengel, R.; Higuchi, M.; Seeburg, P. H. *J. Biol. Chem.* **1996**, *271*(50), 31795–31798.
- <sup>17</sup> Heinrich, J.; Proepper, C.; Schmidt, T.; Linta, L.; Liebau, S.; Boeckers, T. *Neuroscience* **2012**, *221*, 86 – 95.
- <sup>18</sup> Kitiratschky, V. B.; Behnen, P.; Kellner, U.; Heckenlively, J. R.; Zrenner, E.; Jäggle, H.; Kohl, S.; Wissinger, B.; Koch, K.-W. *Hum. Mutat.* **2009**, *30*(8), E782–E796.
- <sup>19</sup> Rosales-Hernandez, A.; Beck, K. E.; Zhao, X.; Braun, A. P.; Braun, J. E. A. *Cell Stress Chaperones* **2009**, *14*(1), 71–82.
- <sup>20</sup> Baecker, T.; Mangus, K.; Pfaender, S.; Chhabra, R.; Boeckers, T. M.; Grabrucker, A. M. *BioMetals* **2014**, *27*(4), 715–730.
- <sup>21</sup> Bobowski, M.; Harduin-Lepers, A.; Delannoy, P. In *Handbook of Glycosyltransferases and Related Genes*; Taniguchi, N., Honke, K., Fukuda, M., Narimatsu, H., Yamaguchi, Y., Angata, T., Eds.; Springer Japan: Tokyo, 2014; pages 767–780.
- <sup>22</sup> Costa, L. G.; de Laat, R.; Dao, K.; Pellacani, C.; Cole, T. B.; Furlong, C. E. *Neurotoxicology* **2014**, *43*, 3 – 9.
- <sup>23</sup> Zhang, Y.; Yu, X.; Ichikawa, M.; Lyons, J. J.; Datta, S.; Lamborn, I. T.; Jing, H.; Kim, E. S.; Biancalana, M.; Wolfe, L. A.; DiMaggio, T.; Matthews, H. F.; Kranick, S. M.; Stone, K. D.; Holland, S. M.; Reich, D. S.; Hughes, J. D.; Mehmet, H.; McElwee, J.; Freeman, A. F.; Freeze, H. H.; Su, H. C.; Milner, J. D. *J. Allergy Clin. Immunol.* **2014**, *133*(5), 1400 – 1409.e5.
- <sup>24</sup> Wolstenholme, J. T.; Rissman, E. F.; Bekiranov, S. *Genes, Brain and Behavior* **2013**, *12*(2), 166–180.
- <sup>25</sup> Su, Y. A.; Zhang, Q.; Su, D. M.; Tang, M. X. *Int. J. Biol. Sci.* **2011**, *7*(3), 308–322.
- <sup>26</sup> Hagino, S.; Iseki, K.; Mori, T.; Zhang, Y.; Hikake, T.; Yokoya, S.; Takeuchi, M.; Hasimoto, H.; Kikuchi, S.; Wanaka, A. *Glia* **2003**, *42*(2), 130–138.
- <sup>27</sup> Labonne, J. D. J.; Lee, K.-H.; Iwase, S.; Kong, I.-K.; Diamond, M. P.; Layman, L. C.; Kim, C.-H.; Kim, H.-G. *Hum. Genet.* **2016**, *135*(7), 757–771.
- <sup>28</sup> Horvath, E. *Genetic Investigations And Counselling On Neurogenetic Disorders* PhD thesis, University of Szege, **2014**.
- <sup>29</sup> Xia, Z.; Chibnik, L. B.; Glanz, B. I.; Liguori, M.; Shulman, J. M.; Tran, D.; Khoury, S. J.; Chitnis, T.; Holyoak, T.; Weiner, H. L.; Guttmann, C. R. G.; De Jager, P. L. *PLOS ONE* **2010**, *5*(11), 1–6.
- <sup>30</sup> Cai, W. W.; Wang, L.; Chen, Y. *Biosci. Biotechnol. Biochem* **2010**, *74*(10), 2050–2055.
- <sup>31</sup> Montague, P.; Barrie, J. A.; Thomson, C. E.; Kirkham, D.; McCallion, A. S.; Davies, R. W.; Kennedy, P. G. E.; Griffiths, I. R. *European Journal of Neuroscience* **1998**, *10*(4), 1321–1328.
- <sup>32</sup> Wurdak, H.; Zhu, S.; Romero, A.; Lorger, M.; Watson, J.; Yuan Chiang, C.; Zhang, J.; Natsu, V. S.; Lairson, L. L.; Walker, J. R.; Trussell, C. M.; Harsh, G. R.; Vogel, H.; Felding-Habermann, B.; Orth, A. P.; Miraglia, L. J.; Rines, D. R.; Skirboll, S. L.; Schultz, P. G. *Cell Stem Cell* **2010**, *6*(1), 37 – 47.
- <sup>33</sup> Caracausi, M.; Rigon, V.; Piovesan, A.; Strippoli, P.; Vitale, L.; Pelleri, M. C. *Hippocampus* **2016**, *26*(1), 13–26.
- <sup>34</sup> Lang, H.; Minaian, K.; Freudenberg, N.; Hoffmann, R.; Brandsch, R. *Biochem. J.* **1994**, *299*(2), 393–398.
- <sup>35</sup> Matsumoto, K.; Ishii, N.; Yoshida, S.; Shiosaka, S.; Wanaka, A.; Tohyama, M. *Brain Res. Mol. Brain Res.* **1998**, *61*(1-2), 179 – 189.
- <sup>36</sup> Properzi, F.; Carulli, D.; Asher, R. A.; Muir, E.; Camargo, L. M.; Van Kuppevelt, T. H.; Ten Dam, G. B.; Furukawa, Y.; Mikami, T.; Sugahara, K.; Toida, T.; Geller, H. M.; Fawcett, J. W. *Eur. J. Neurosci.* **2005**, *21*(2), 378–390.
- <sup>37</sup> Salogiannis, J. *Regulation of excitatory synapse development by the RhoGEF Ephexin5* PhD thesis, Harvard University, **2013**.
- <sup>38</sup> Iacobas, S.; Iacobas, D.; Spray, D.; Scemes, E. *Brain Res.* **2012**, *1487*, 131 – 139.
- <sup>39</sup> Lu, L.; Wei, L.; Peirce, J. L.; Wang, X.; Zhou, J.; Homayouni, R.; Williams, R. W.; Airey, D. C. *BMC Genomics* **2008**, *9*(1), 444.



- <sup>40</sup> Anta, B.; Martín-Rodríguez, C.; Gomis-Perez, C.; Calvo, L.; López-Benito, S.; Calderón-García, A. A.; Vicente-García, C.; Villarroel, Á.; Arévalo, J. C. *J. Biol. Chem.* **2016**, *291*(36), 19132–19145.
- <sup>41</sup> Gillingham, A. K.; Sinka, R.; Torres, I. L.; Lilley, K. S.; Munro, S. *Developmental Cell* **2014**, *31*(3), 358 – 373.
- <sup>42</sup> Gelbard, H. A.; Dewhurst, S.; Maggirwar, S. B.; Kiebala, M.; Poleskaya, O.; Gendelman, H. E. *Neurotherapeutics* **2010**, *7*(4), 392 – 398.
- <sup>43</sup> Borgesius, N. Z.; van Woerden, G. M.; Buitendijk, G. H. S.; Keijzer, N.; Jaarsma, D.; Hoogenraad, C. C.; Elgersma, Y. *J. Neurosci.* **2011**, *31*(28), 10141–10148.
- <sup>44</sup> Chen, L.-T.; Liang, W.-X.; Chen, S.; Chen, Z.; Chen, S.-J. *Blood* **2015**, *120*(21), 764–764.
- <sup>45</sup> Kim, G. W.; Lin, J. E.; Waldman, S. A. *Trends in Endocrinology & Metabolism* **2013**, *24*(4), 165 – 173.
- <sup>46</sup> Chong, A.; Zhang, Z.; Choi, K. P.; Choudhary, V.; Djamgoz, M. B.; Zhang, G.; Bajic, V. B. *Genomics* **2007**, *89*(3), 378 – 384.
- <sup>47</sup> Jahanshad, N.; Rajagopalan, P.; Hua, X.; Hibar, D. P.; Nir, T. M.; Toga, A. W.; Jack, C. R.; Saykin, A. J.; Green, R. C.; Weiner, M. W.; Medland, S. E.; Montgomery, G. W.; Hansell, N. K.; McMahon, K. L.; de Zubicaray, G. I.; Martin, N. G.; Wright, M. J.; Thompson, P. M.; the Alzheimer’s Disease Neuroimaging Initiative. *Proc. Natl. Acad. Sci. USA* **2013**, *110*(12), 4768–4773.
- <sup>48</sup> Wilburn, B.; Rudnicki, D. D.; Zhao, J.; Weitz, T. M.; Cheng, Y.; Gu, X.; Greiner, E.; Park, C. S.; Wang, N.; Sopher, B. L.; Spada, A. R. L.; Osmand, A.; Margolis, R. L.; Sun, Y. E.; Yang, X. W. *Neuron* **2011**, *70*(3), 427 – 440.
- <sup>49</sup> Szablewski, L. *J. Alzheimers Dis.* **2016**, *55*(4), 1307–1320.
- <sup>50</sup> Shcherbatyy, V.; Carson, J.; Yaylaoglu, M.; Jäckle, K.; Grabbe, F.; Brockmeyer, M.; Yavuz, H.; Eichele, G. *Neuroinformatics* **2015**, *13*(1), 111–125.
- <sup>51</sup> Suls, A.; Jaehn, J. A.; Kecskés, A.; Weber, Y.; Weckhuysen, S.; Craiu, D. C.; Siekierska, A.; Djémié, T.; Afrikanova, T.; Gormley, P.; von Spiczak, S.; Kluger, G.; Iliescu, C. M.; Talvik, T.; Talvik, I.; Meral, C.; Caglayan, H. S.; Giraldez, B. G.; Serratos, J.; Lemke, J. R.; Hoffman-Zacharska, D.; Szczepanik, E.; Barisic, N.; Komarek, V.; Hjalgrim, H.; Møller, R. S.; Linnankivi, T.; Dimova, P.; Striano, P.; Zara, F.; Marini, C.; Guerrini, R.; Depienne, C.; Baulac, S.; Kuhlenbäumer, G.; Crawford, A. D.; Lehesjoki, A.-E.; de Witte, P. A.; Palotie, A.; Lerche, H.; Esguerra, C. V.; Jonghe, P. D.; Helbig, I.; Hendrickx, R.; Holmgren, P.; Stephani, U.; Muhle, H.; Pendiziwiat, M.; Appenzeller, S.; Selmer, K.; Brilstra, E.; Koeleman, B.; Rosenow, F.; Leguern, E.; Sterbova, K.; Magdalena, B.; Rodica, G.; Arsene, O. T.; Diana, B.; Guerrero-Lopez, R.; Ortega, L.; Todorova, A. P.; Kirov, A. V.; Robbiano, A.; Arslan, M.; Yiş, U.; Ivanović, V. *Am. J. Hum. Genet.* **2013**, *93*(5), 967 – 975.
- <sup>52</sup> Kuppili, R. R.; Bose, K. In *Proteases in Apoptosis: Pathways, Protocols and Translational Advances*; Bose, K., Ed.; Springer International Publishing: Cham, 2015; pages 53–94.
- <sup>53</sup> Marín, F.; Nieto, M. A. *Dev. Dynam.* **2006**, *235*(9), 2586–2591.
- <sup>54</sup> Anthoni, H.; Zucchelli, M.; Matsson, H.; Müller-Myhsok, B.; Fransson, I.; Schumacher, J.; Massinen, S.; Onkamo, P.; Warnke, A.; Griesemann, H.; Hoffmann, P.; Nopola-Hemmi, J.; Lyytinen, H.; Schulte-Körne, G.; Kere, J.; Nøthen, M. M.; Peyrard-Janvid, M. *Hum. Mol. Gen.* **2007**, *16*(6), 667.
- <sup>55</sup> Tweedie, D.; Rachmany, L.; Rubovitch, V.; Lehrmann, E.; Zhang, Y.; Becker, K. G.; Perez, E.; Miller, J.; Hoffer, B. J.; Greig, N. H.; Pick, C. G. *Experimental Neurology* **2013**, *239*, 170 – 182.
- <sup>56</sup> Sperlágh, B.; Vizi, E. S. *Neurochemical Research* **2007**, *32*(11), 1978–1989.
- <sup>57</sup> Dutta, S.; Dawid, I. B. *Development* **2010**, *137*(18), 3013–3018.
- <sup>58</sup> Yoon, K.-J.; Lee, H.-R.; Jo, Y. S.; An, K.; Jung, S.-Y.; Jeong, M.-W.; Kwon, S.-K.; Kim, N.-S.; Jeong, H.-W.; Ahn, S.-H.; Kim, K.-T.; Lee, K.; Kim, E.; Kim, J.-H.; Choi, J.-S.; Kaang, B.-K.; Kong, Y.-Y. *Molecular Brain* **2012**, *5*(1), 40.
- <sup>59</sup> Long, P.; Samnakay, P.; Jenner, P.; Rose, S. *Eur. J. Neurosci.* **2012**, *36*(6), 2733–2742.
- <sup>60</sup> Bollen, E.; Prickaerts, J. *IUBMB Life* **2012**, *64*(12), 965–970.
- <sup>61</sup> Gong, J.; Grodsky, J. D.; Zhang, Z.; Wang, P. *Eukaryotic Cell* **2014**, *13*(10), 1290–1299.
- <sup>62</sup> Hernandez-Deviez, D. J.; Casanova, J. E.; Wilson, J. M. *Nat. Neurosci.* **2002**, *5*.
- <sup>63</sup> Brown, M. E.; Bridgman, P. C. *J. Neurobiol.* **2004**, *58*(1), 118–130.

- <sup>64</sup> Ishisaka, M.; Hara, H. *J Pharmacol Sci* **2014**, *124*(3), 336–343.
- <sup>65</sup> Wong, T. H.; Chiu, W. Z.; Breedveld, G. J.; Li, K. W.; Verkerk, A. J. M. H.; Hondius, D.; Hukema, R. K.; Seelaar, H.; Frick, P.; Severijnen, L.-A.; Lammers, G.-J.; Lebbink, J. H. G.; van Duinen, S. G.; Kamphorst, W.; Rozemuller, A. J.; Bakker, E. B.; Neumann, M.; Willemsen, R.; Bonifati, V.; Smit, A. B.; van Swieten, J. *Brain* **2014**, *137*(5), 1361.
- <sup>66</sup> DeAndrade, M. P.; Zhang, L.; Doroodchi, A.; Yokoi, F.; Cheetham, C. C.; Chen, H.-X.; Roper, S. N.; Sweatt, J. D.; Li, Y. *PLOS ONE* **2012**, *7*(4), 1–10.
- <sup>67</sup> Fernández-Fernández, D.; Rosenbrock, H.; Kroker, K. S. *Synapse* **2015**, *69*(10), 484–496.
- <sup>68</sup> Morderer, D.; Nikolaienko, O.; Skrypkina, I.; Cherkas, V.; Tsyba, L.; Belan, P.; Rynditch, A. *Gene* **2012**, *505*(2), 360 – 364.
